# Supplementary material
Source: PubMed Central journal article supplement (PMC5484537)
Supplement: NIHMS868756-supplement.pdf [file NIHMS868756-supplement.pdf]

## Supporting Information

### Structure-guided development of covalent TAK1 inhibitors

Li Tan<sup>1,2,#</sup>, Deepak Gurbani<sup>3#</sup>, Ellen L. Weisberg<sup>4,5</sup>, John C. Hunter<sup>3</sup>, Lianbo Li<sup>3</sup>, Douglas S. Jones<sup>6,7</sup>, Scott B. Ficarro<sup>1,2</sup>, Samar Mowafy<sup>1,2,8</sup>, Chun-Pong Tam<sup>1,2</sup>, Suman Rao<sup>1,2,6</sup>, Guangyan Du<sup>1,2</sup>, James D. Griffin<sup>4,5</sup>, Peter K. Sorger<sup>6,7</sup>, Jarrod A. Marto<sup>1,2</sup>, Kenneth D. Westover<sup>3\*</sup>, Nathanael S. Gray<sup>1,2\*</sup>

Department of <sup>1</sup>Cancer Biology and <sup>4</sup>Medical Oncology, Dana Farber Cancer Institute, Boston, MA 02115; Department of <sup>2</sup>Biological Chemistry and Molecular Pharmacology and <sup>5</sup>Medicine, <sup>6</sup>HMS LINCS Center and Laboratory of Systems Pharmacology, Harvard Medical School, Boston, MA 02215; <sup>3</sup>Departments of Biochemistry and Radiation Oncology, The University of Texas, Southwestern Medical Center, 5323 Harry Hines Blvd., Dallas, TX 75390; <sup>7</sup>Department of Biological Engineering, Massachusetts Institute of Technology, Cambridge, MA 02139, USA; <sup>8</sup>Misr International University, Km 28 Cairo, Ismailia Rd., Ahmed Orabi Dist., Cairo, Egypt

# These authors contributed equally.

\*Email addresses for correspondence:

Kenneth.Westover@UTSouthwestern.edu (KDW); Nathanael\_Gray@dfci.harvard.edu (NSG)

## Table of Contents

|                                                   |    |
|---------------------------------------------------|----|
| Supplementary Figures.....                        | 3  |
| Experimental Procedures.....                      | 9  |
| Synthetic procedures and physical properties..... | 9  |
| Mass spectrometry procedures.....                 | 24 |
| Covalent inhibition kinetics .....                | 25 |
| Supplementary Tables .....                        | 26 |

## Supplementary Figures

**Figure S1.** (A) Ligplot describing interactions of **1** bound to TAK1-TAB1 (PDB ID: 5J9L). Hydrogen bonding interactions (green lines) with Glu105 and Ala107 are shown; (B) Structural interactions for WZ4002 bound to the EGFR mutant (PDB ID: 3IKA). Hydrogen bonding interactions (green lines) with Met793 are shown. Equivalent hydrophobic residues between both TAK1 and EGFR are also shown (curved red lines with spikes).

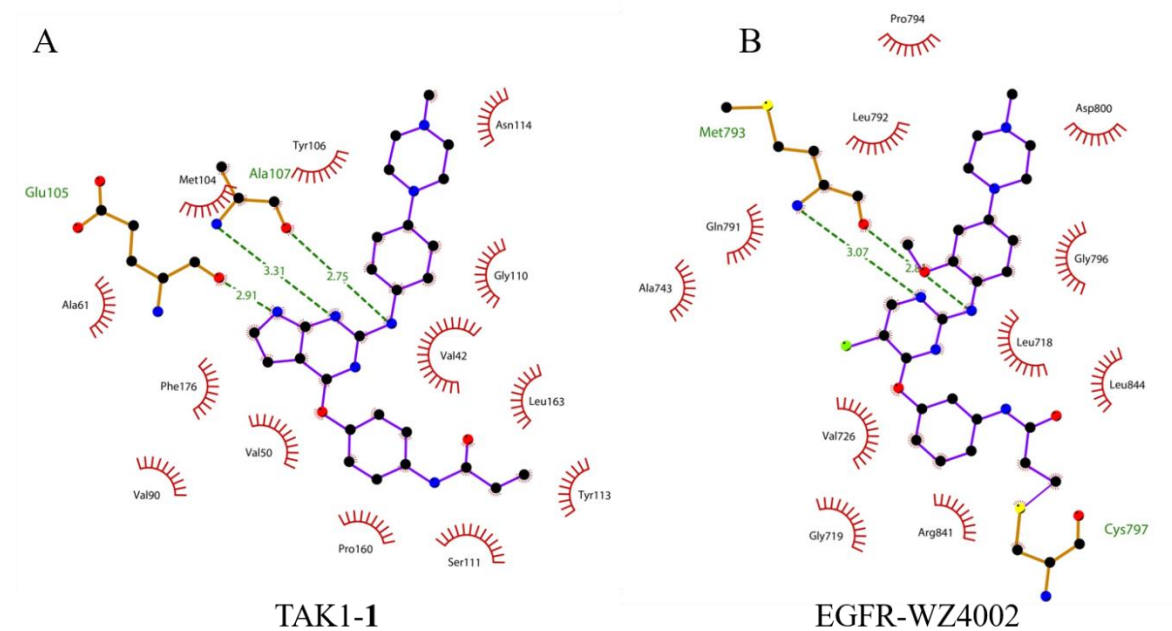

**Figure S2.** (A) Fo-Fc map (green mesh), contoured at  $2.5\sigma$  for **1** in the ATP binding site of TAK1-TAB1. The 2-position of the 4-acrylamidophenyl group of **1** is located  $4.5 \text{ \AA}$  away from the thiol of Cys174; (B) Fo-Fc map (green mesh), contoured at  $2.5\sigma$  for **2**, which demonstrates continuous density with Cys-174 indicating covalent linkage.

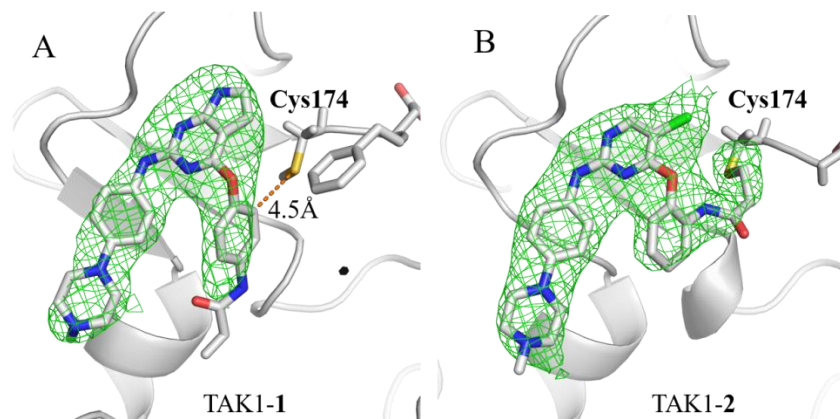

**Figure S3.** Compound **2** covalently labels TAK1 at Cys174. Raw (A, C) and deconvoluted (B, D) mass spectra obtained for TAK1 after treatment with (A, B) DMSO and (C, D) **2**. FT-HCD MS/MS spectrum of inhibitor modified TAK1 peptide I(C\*)DEGTACDIQTHMTNNK (residues 173-190). Ions of type b and y are shown in blue and red, respectively. Note b2 and b3 ions localize the site of modification to C174. No other labeled cysteine residues were detected. (C\* denotes compound **2** modified cysteine residue).

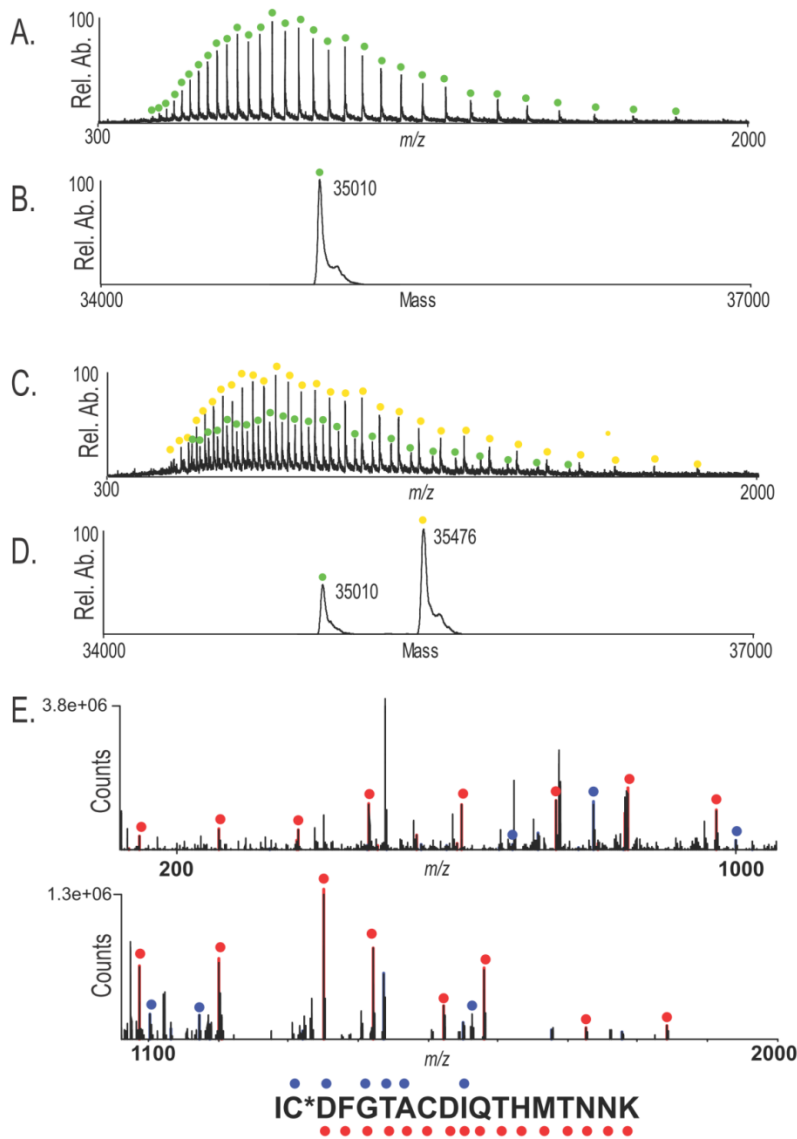

**Figure S4:** Determination of  $K_{inact}/K_i$  for **5**. (A) Time-dependent inhibition of TAK1 by **5**. TAK1 activity was measured using a peptide substrate mobility shift assay. (B) Transform of data to show time-dependent leftward shift in  $IC_{50}$  values indicative of TAK1 inactivation. (C) Inactivation rates were determined using nonlinear least-squares regression. (D)  $K_{inact}/K_i$  values for compound **5** on TAK1.

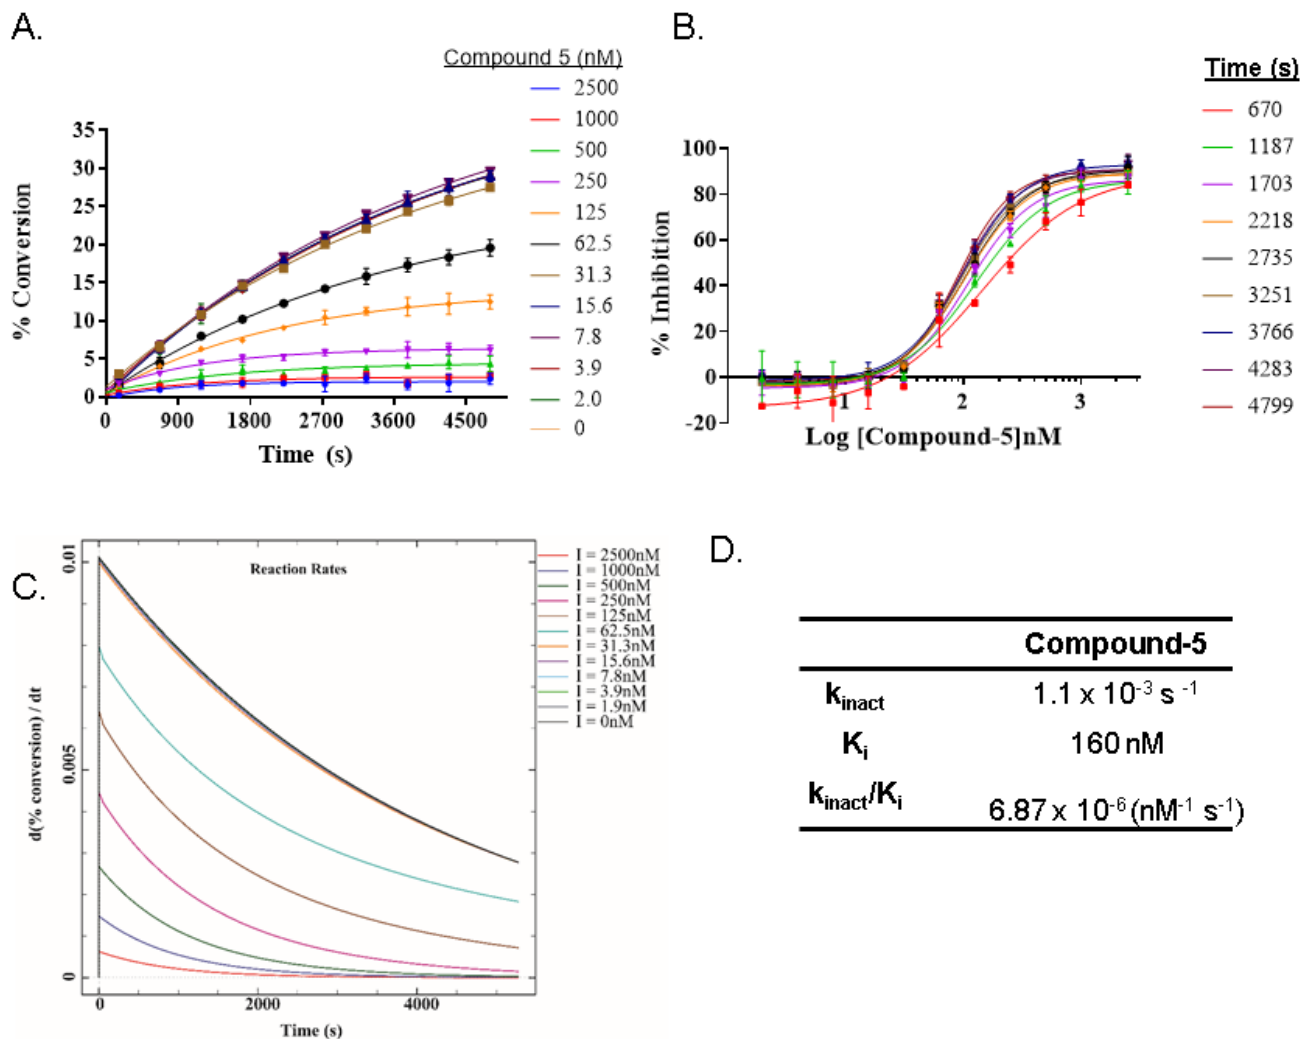

**Figure S5.** TREEspot kinase interaction maps based on the KINOMEScan profiling results of compounds **5**, **7**, **9**, **23** and **25**. The kinases with a DFG-1 cysteine residue were highlighted with blue color in the All three inhibitors were profiled at a concentration of 1  $\mu$ M against a diverse panel of more than 456 kinases and mutants. Scores for primary screen hits are reported as a percent of the DMSO control (% control), the lower the Kd is likely to be, such that scores of zero represent strong hits. Scores are related to the probability of a hit but are not strictly an affinity measurement, and bigger spots in the maps reflect lower scores.

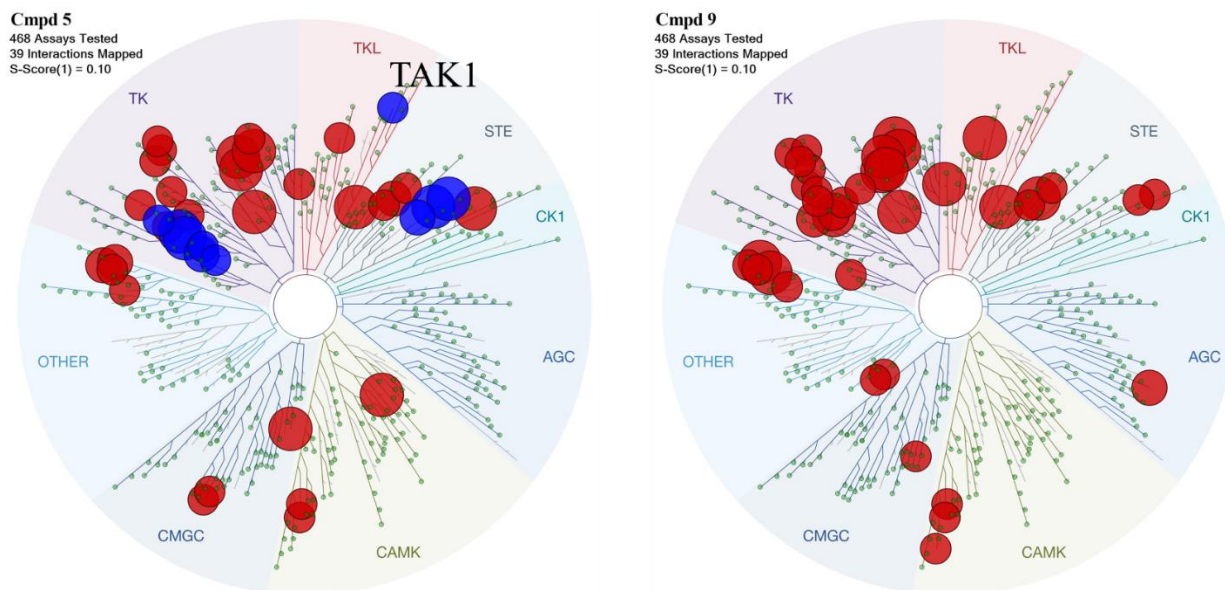

**Cmpd 7**  
456 Assays Tested  
73 Interactions Mapped  
S-Score(1) = 0.19

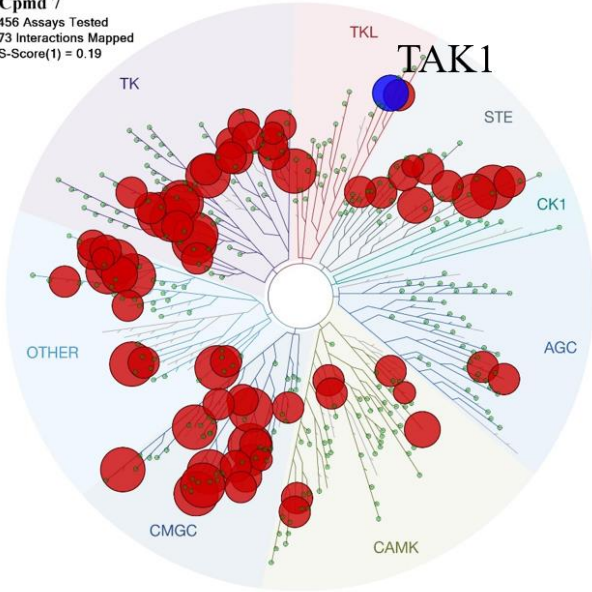

**Cmpd 23**  
468 Assays Tested  
37 Interactions Mapped  
S-Score(5) = 0.10

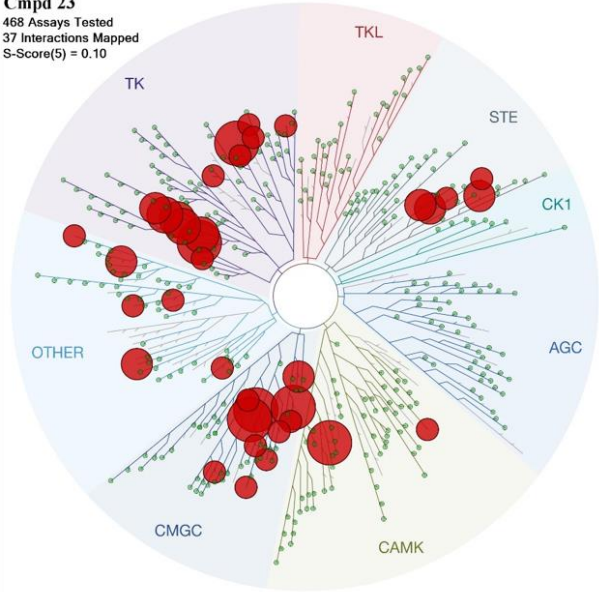

**Cmpd 25**  
468 Assays Tested  
12 Interactions Mapped  
S-Score(5) = 0.03

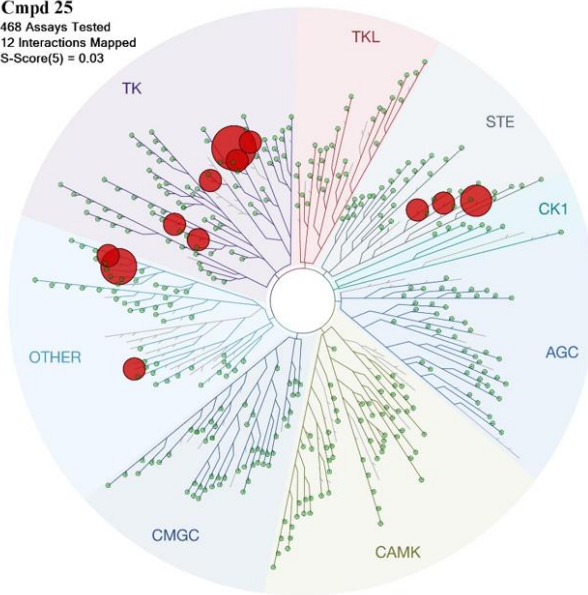



## Experimental Procedures

**Chemistry.** Unless otherwise noted, reagents and solvents were obtained from commercial suppliers and were used without further purification.  $^1\text{H}$  NMR spectra were recorded on 600 or 500 MHz (Varian AS600 or Bruker A500), and chemical shifts are reported in parts per million (ppm,  $\delta$ ) downfield from tetramethylsilane (TMS). Coupling constants ( $J$ ) are reported in Hz. Spin multiplicities are described as s (singlet), br (broad singlet), d (doublet), t (triplet), q (quartet), and m (multiplet). Mass spectra were obtained on a Waters Micromass ZQ instrument. Preparative HPLC was performed on a Waters Sunfire C18 column (19 x 50 mm, 5  $\mu\text{M}$ ) using a gradient of 15-95% methanol in water containing 0.05% trifluoroacetic acid (TFA) over 22 min (28 min run time) at a flow rate of 20 mL/min. Purities of assayed compounds were in all cases greater than 95%, as determined by reverse-phase HPLC analysis.

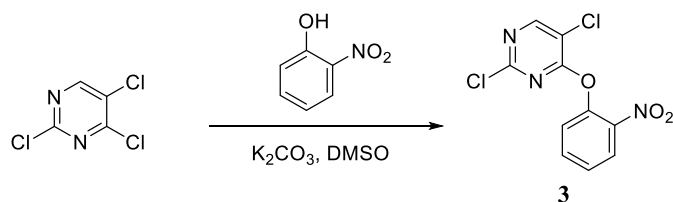

**2,5-dichloro-4-(2-nitrophenoxy)pyrimidine (3).** 2-Nitrophenol (840 mg, 6.0 mmol) and potassium carbonate (800 mg, 6.0 mmol) were combined in dimethyl sulfoxide (DMSO) (10 mL) and stirred for 15 min, then 2,4,5-trichloropyrimidine (560  $\mu\text{L}$ , 5.0 mmol) was added and the mixture was stirred overnight. The mixture was then diluted with ethyl acetate and washed with water and brine, dried over  $\text{Na}_2\text{SO}_4$ , filtered and concentrated. The crude product was purified by column chromatography (hexane:ethyl acetate = 3:1) to yield 1.2 g (70%) of **3** as a white solid. MS (ESI)  $m/z$  286 ( $\text{M}+\text{H}$ ) $^+$ .

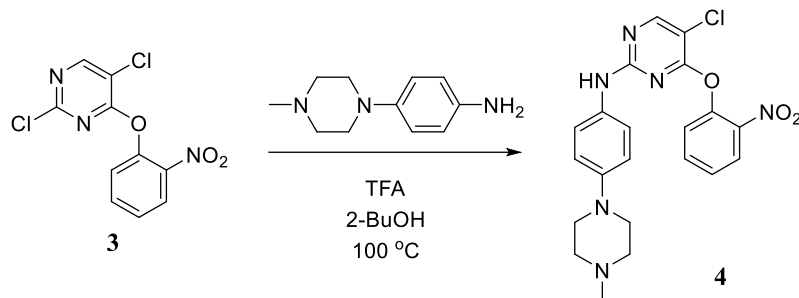

**5-chloro-N-(4-(4-methylpiperazin-1-yl)phenyl)-4-(2-nitrophenoxy)pyrimidin-2-amine (4).**

To **3** (570 mg, 2.0 mmol) and 2-methoxy-4-(4-methylpiperazin-1-yl)aniline (390 mg, 2.0 mmol) in *sec*-butanol (4 mL) was added trifluoroacetic acid (154  $\mu$ L, 2.0 mmol) and the mixture was stirred overnight at 75 °C. The mixture was then concentrated, neutralized with ammonia in methanol and purified by column chromatography (dichloromethane:methanol = 10:1) to yield 265 mg (60%) of **4** as a pale-yellow solid. MS (ESI)  $m/z$  441 (M+H)<sup>+</sup>.

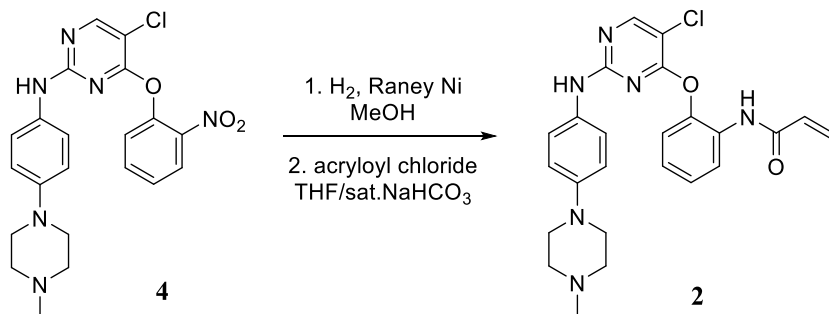

**N-(2-((5-chloro-2-((4-(4-methylpiperazin-1-yl)phenyl)amino)pyrimidin-4-**

**yl)oxy)phenyl)acrylamide (2).** To **4** (88 mg, 0.2 mmol) in methanol (10 mL) was added 1 mL Raney nickel suspension in methanol. The reaction mixture was stirred for 3 h under 1 atm of hydrogen. The mixture was then filtered with celite, and the filtrate was concentrated and dried under vacuum to give a crude product as a white solid. To the obtained white solid in tetrahydrofuran (3 mL) was added saturated NaHCO<sub>3</sub> solution (3 mL), the stirred mixture was then cooled to 0 °C, and acryloyl chloride was added (25  $\mu$ L, 0.3 mmol) dropwise. The reaction mixture was stirred at 0 °C for 10 min, another batch of acryloyl chloride was added (8  $\mu$ L, 0.1

mmol) dropwise. After another 5 min the mixture was allowed to recover to room temperature (RT), and diluted with ethyl acetate and washed with water and brine, dried over Na<sub>2</sub>SO<sub>4</sub>, filtered and concentrated. The crude product was then purified by reverse phase HPLC to give 58 mg (63% for 2 steps) of **2** as a white solid. <sup>1</sup>H NMR (600 MHz, DMSO-*d*<sub>6</sub>) δ 9.68 (br, 1H), 9.58 (s, 1H), 9.52 (br, 1H), 8.40 (s, 1H), 8.05 (m, 1H), 7.32 (dd, *J* = 8.4, 8.4 Hz, 2H), 7.24 (d, *J* = 8.4 Hz, 2H), 6.72 (m, 2H), 6.55 (dd, *J* = 16.8, 10.8 Hz, 1H), 6.20 (d, *J* = 16.8 Hz, 1H), 5.71 (d, *J* = 10.8 Hz, 1H), 3.66 (m, 2H), 3.50 (m, 2H), 3.14 (m, 2H), 2.85 (s, 3H), 2.83 (m, 2H). MS (ESI) *m/z* 465 (M+H)<sup>+</sup>.

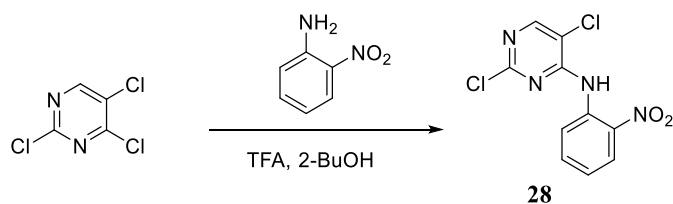

**2,5-dichloro-N-(2-nitrophenyl)pyrimidin-4-amine (28).** To 2,4,5-trichloropyrimidine (560 μL mg, 5.0 mmol) and 2-nitroaniline (700 mg, 5.0 mmol) in *sec*-butanol (25 mL) was added trifluoroacetic acid (383 μL, 5.0 mmol) and the mixture was stirred overnight at 60 °C. The mixture was then concentrated, neutralized with ammonia in methanol and purified by column chromatography (hexane:ethyl acetate = 2:1) to yield 640 mg (45%) of **28** as a yellow solid. MS (ESI) *m/z* 285 (M+H)<sup>+</sup>.

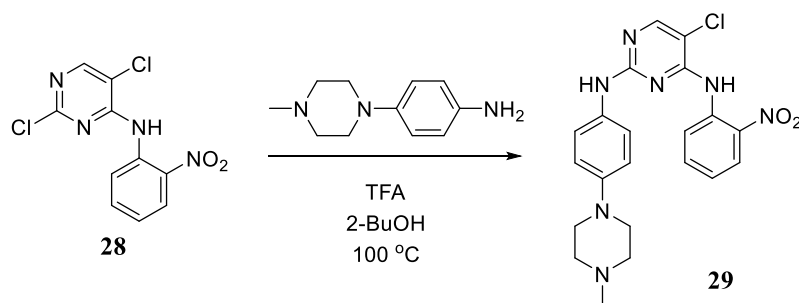

**5-chloro-N<sup>2</sup>-(4-(4-methylpiperazin-1-yl)phenyl)-N<sup>4</sup>-(2-nitrophenyl)pyrimidine-2,4-diamine (29).** To **28** (570 mg, 2.0 mmol) and 2-methoxy-4-(4-methylpiperazin-1-yl)aniline (390 mg, 2.0

mmol) in *sec*-butanol (4 mL) was added trifluoroacetic acid (154  $\mu$ L, 2.0 mmol) and the mixture was stirred overnight at 85  $^{\circ}$ C. The mixture was then concentrated, neutralized with ammonia in methanol and purified by column chromatography (dichloromethane:methanol = 10:1) to yield 680 mg (76%) of **29** as a pale-yellow solid. MS (ESI)  $m/z$  440 (M+H) $^{+}$ .

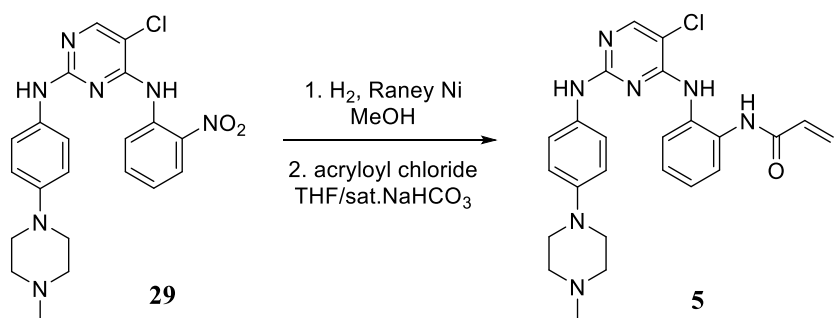

***N*-(2-((5-chloro-2-((4-(4-methylpiperazin-1-yl)phenyl)amino)pyrimidin-4-**

**yl)amino)phenyl)acrylamide (5).** To **29** (88 mg, 0.2 mmol) in methanol (10 mL) was added 1

mL Raney nickel suspension in methanol. The reaction mixture was stirred for 3 h under 1 atm of hydrogen. The mixture was then filtered with celite, and the filtrate was concentrated and

dried under vacuum to give a crude product as a white solid. To the obtained white solid in tetrahydrofuran (3 mL) was added saturated NaHCO<sub>3</sub> solution (3 mL), the stirred mixture was

then cooled to 0  $^{\circ}$ C, and acryloyl chloride was added (25  $\mu$ L, 0.3 mmol) dropwise. The reaction mixture was stirred at 0  $^{\circ}$ C for 10 min, another batch of acryloyl chloride was added (8  $\mu$ L, 0.1

mmol) dropwise. After another 5 min the mixture was allowed to recover to room temperature (RT), and diluted with ethyl acetate and washed with water and brine, dried over Na<sub>2</sub>SO<sub>4</sub>, filtered

and concentrated. The crude product was then purified by reverse phase HPLC to give 55 mg (60% for 2 steps) of **5** as a white solid. <sup>1</sup>H NMR (600 MHz, DMSO-*d*<sub>6</sub>)  $\delta$  10.16 (s, 1H), 9.67 (br, 1H),

9.20 (br, 1H), 8.56 (s, 1H), 8.09 (s, 1H), 7.74 (d,  $J$  = 7.2 Hz, 1H), 7.46 (d,  $J$  = 6.6 Hz, 1H), 7.40 (d,  $J$  = 9.0 Hz, 2H), 7.32 (dd,  $J$  = 7.2, 7.2 Hz, 1H), 7.24 (dd,  $J$  = 7.8, 7.2 Hz, 1H), 6.78 (d,  $J$  = 9.6

Hz, 1H), 6.50 (dd,  $J = 16.8, 10.8$  Hz, 1H), 6.30 (d,  $J = 17.4$  Hz, 1H), 5.79 (d,  $J = 10.8$  Hz, 1H), 3.66 (m, 2H), 3.49 (m, 2H), 3.14 (m, 2H), 2.84 (s, 3H), 2.83 (m, 2H). MS (ESI)  $m/z$  464 (M+H)<sup>+</sup>.

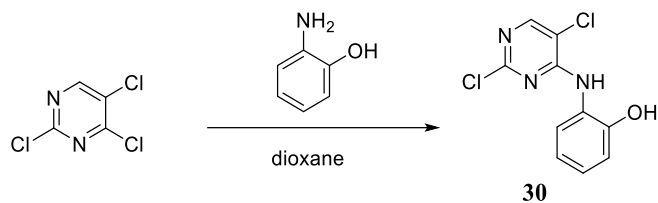

**2-((2,5-dichloropyrimidin-4-yl)amino)phenol (30)**. To 2-aminophenol (550 mg, 5.0 mmol) in dioxane (10 mL) was added 2,4,5-trichloropyrimidine (560  $\mu$ L mg, 5.0 mmol), the mixture was stirred overnight at RT. The mixture was then diluted with ethyl acetate and washed with water and brine, dried over Na<sub>2</sub>SO<sub>4</sub>, filtered and concentrated to give 1.02 g (80%) of the crude product **30** as a white solid, which was directly used in the next step. MS (ESI)  $m/z$  256 (M+H)<sup>+</sup>.

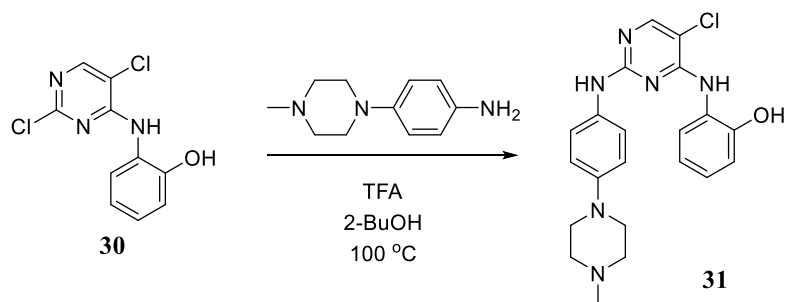

**2-((5-chloro-2-((4-(4-methylpiperazin-1-yl)phenyl)amino)pyrimidin-4-yl)amino)phenol (31)**.

To **30** (510 mg, 2.0 mmol) and 2-methoxy-4-(4-methylpiperazin-1-yl)aniline (575 mg, 3.0 mmol) in *sec*-butanol (5 mL) was added trifluoroacetic acid (230  $\mu$ L, 3.0 mmol) and the mixture was stirred overnight at 100 °C. The mixture was then concentrated, neutralized with ammonia in methanol and purified by column chromatography (dichloromethane:methanol = 10:1) to yield 680 mg (76%) of **31** as a white solid. MS (ESI)  $m/z$  411 (M+H)<sup>+</sup>.

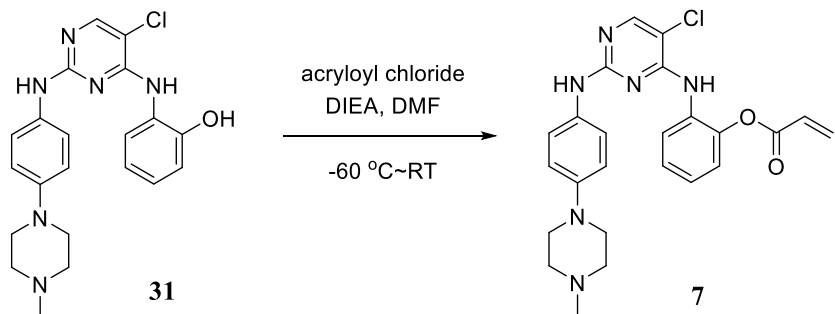

**2-((5-chloro-2-((4-(4-methylpiperazin-1-yl)phenyl)amino)pyrimidin-4-yl)amino)phenyl**

**acrylate (7).** To **31** (82 mg, 0.2 mmol) in dimethylformamide (2 mL) was added diisopropylethylamine (53  $\mu$ L, 0.3 mmol), the stirred mixture was then cooled to -60  $^{\circ}$ C, and acryloyl chloride (17.8  $\mu$ L, 0.22 mmol) was added dropwise. The reaction mixture was stirred at -60  $^{\circ}$ C for 10 min, allowed to recover to RT (room temperature) gradually in 30 min, and purified by reverse phase HPLC to give 64 mg (TFA salt, 56% for 2 steps) of **7** as a white solid.

$^1$ H NMR (600 MHz, DMSO- $d_6$ )  $\delta$  8.96 (br, 1H), 8.36 (s, 1H), 8.04 (s, 1H), 7.72 (br, 1H), 7.34 (d,  $J$  = 9.0 Hz, 2H), 7.30 (m, 3H), 6.70 (d,  $J$  = 9.0 Hz, 2H), 6.37 (d,  $J$  = 16.8, 1H), 6.26 (dd,  $J$  = 17.4, 10.2 Hz, 1H), 5.79 (d,  $J$  = 10.8 Hz, 1H), 3.02 (m, 4H), 2.54 (m, 4H), 2.28 (br, 3H), 2.84 (s, 3H).

MS (ESI)  $m/z$  465 (M+H) $^+$ .

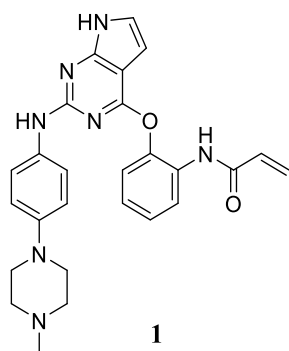

***N*-(2-((2-((4-(4-methylpiperazin-1-yl)phenyl)amino)-7H-pyrrolo[2,3-d]pyrimidin-4-yl)oxy)phenyl)acrylamide (1).** MS (ESI)  $m/z$  470 (M+H) $^+$ .

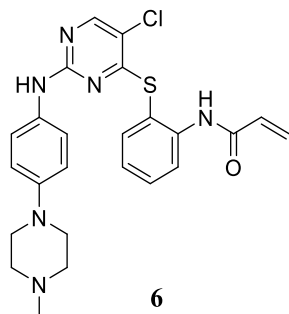

**2-((5-chloro-2-((4-(4-methylpiperazin-1-yl)phenyl)amino)pyrimidin-4-yl)amino)phenyl**

**acrylate (6).**  $^1\text{H}$  NMR (600 MHz,  $\text{DMSO-}d_6$ )  $\delta$  9.82 (br, 1H), 9.60 (s, 1H), 9.50 (br, 1H), 8.43 (br, 1H), 8.10 (s, 1H), 7.97 (d,  $J = 7.8$  Hz, 1H), 7.68 (dd,  $J = 7.8, 7.2$  Hz, 2H), 7.64 (d,  $J = 7.8$  Hz, 1H), 7.44 (d,  $J = 8.4$  Hz, 2H), 6.85 (br, 1H), 6.59 (dd,  $J = 16.8, 10.8$  Hz, 1H), 6.20 (d,  $J = 16.8$  Hz, 1H), 5.72 (d,  $J = 10.8$  Hz, 1H), 3.65 (m, 2H), 3.51 (m, 2H), 3.15 (m, 2H), 2.86 (s, 3H), 2.84 (m, 2H). MS (ESI)  $m/z$  465 ( $\text{M}+\text{H}$ ) $^+$ .

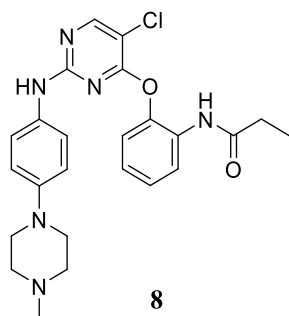

***N*-(2-((5-chloro-2-((4-(4-methylpiperazin-1-yl)phenyl)amino)pyrimidin-4-**

**yl)oxy)phenyl)propionamide (8).**  $^1\text{H}$  NMR (600 MHz,  $\text{DMSO-}d_6$ )  $\delta$  9.69 (br, 1H), 9.48 (br, 1H), 9.28 (s, 1H), 8.38 (s, 1H), 7.89 (d,  $J = 7.2$  Hz, 1H), 7.28 (d,  $J = 7.2$  Hz, 2H), 7.24 (m, 1H), 7.22 (d,  $J = 7.2$  Hz, 1H), 6.70 (m, 2H), 3.63 (m, 2H), 3.48 (m, 2H), 3.13 (m, 2H), 2.84 (s, 3H), 2.82 (m, 2H), 2.26 (m, 2H), 0.98 (t,  $J = 7.2$  Hz, 3H). MS (ESI)  $m/z$  467 ( $\text{M}+\text{H}$ ) $^+$ .

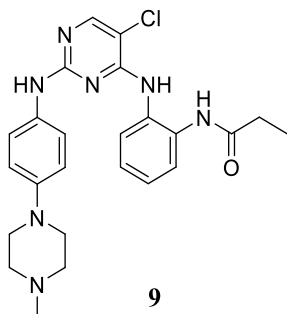

***N*-(2-((5-chloro-2-((4-(4-methylpiperazin-1-yl)phenyl)amino)pyrimidin-4-**

**yl)amino)phenyl)propionamide (9).** <sup>1</sup>H NMR (600 MHz, DMSO-*d*<sub>6</sub>) δ 9.95 (s, 1H), 9.71 (br, 1H), 9.26 (br, 1H), 8.52 (s, 1H), 8.12 (s, 1H), 7.76 (d, *J* = 8.4 Hz, 1H), 7.42 (d, *J* = 9.0 Hz, 2H), 7.34 (d, *J* = 7.2 Hz, 2H), 7.31 (dd, *J* = 7.2, 7.2 Hz, 1H), 7.24 (dd, *J* = 7.8, 7.8 Hz, 1H), 6.81 (d, *J* = 9.0 Hz, 2H), 3.68 (m, 2H), 3.51 (m, 2H), 3.16 (m, 2H), 2.87 (m, 2H), 2.86 (s, 3H), 2.37 (q, *J* = 7.8 Hz, 2H), 1.10 (t, *J* = 7.8 Hz, 3H). MS (ESI) *m/z* 466 (M+H)<sup>+</sup>.

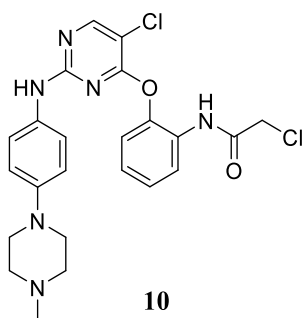

**2-chloro-*N*-(2-((5-chloro-2-((4-(4-methylpiperazin-1-yl)phenyl)amino)pyrimidin-4-**

**yl)oxy)phenyl)acetamide (10).** <sup>1</sup>H NMR (600 MHz, DMSO-*d*<sub>6</sub>) δ 9.69 (br, 1H), 9.68 (s, 1H), 9.54 (br, 1H), 8.42 (s, 1H), 7.97 (d, *J* = 8.4 Hz, 1H), 7.34 (dd, *J* = 7.2, 7.2 Hz, 2H), 7.28 (dd, *J* = 7.2 Hz, 1H), 7.24 (m, 1H), 6.71 (m, 2H), 4.26 (s, 2H), 3.65 (m, 2H), 3.50 (m, 2H), 3.14 (m, 2H), 2.85 (s, 3H), 2.84 (m, 2H). MS (ESI) *m/z* 487 (M+H)<sup>+</sup>.



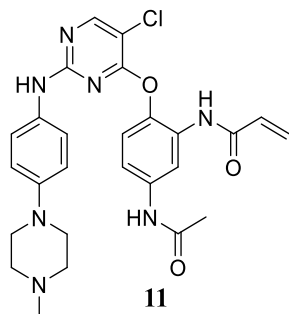

***N*-(5-acetamido-2-((5-chloro-2-((4-(4-methylpiperazin-1-yl)phenyl)amino)pyrimidin-4-yl)oxy)phenyl)acrylamide (11).** <sup>1</sup>H NMR (600 MHz, DMSO-*d*<sub>6</sub>) δ 10.11 (s, 1H), 9.73 (br, 1H), 9.51 (br, 1H), 9.50 (s, 1H), 8.38 (s, 1H), 8.20 (s, 1H), 7.52 (d, *J* = 9.0 Hz, 1H), 7.22 (br, 1H), 7.19 (d, *J* = 9.0 Hz, 1H), 6.71 (m, 2H), 6.53 (dd, *J* = 16.8, 10.8 Hz, 1H), 6.19 (d, *J* = 16.8 Hz, 1H), 5.70 (d, *J* = 10.8 Hz, 1H), 3.65 (m, 2H), 3.49 (m, 2H), 3.14 (m, 2H), 2.85 (s, 3H), 2.84 (m, 2H), 2.08 (s, 3H). MS (ESI) *m/z* 522 (M+H)<sup>+</sup>.

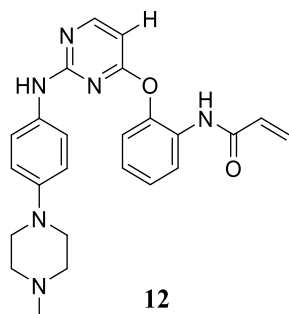

***N*-(2-((2-((4-(4-methylpiperazin-1-yl)phenyl)amino)pyrimidin-4-yl)oxy)phenyl)acrylamide (12).** <sup>1</sup>H NMR (600 MHz, DMSO-*d*<sub>6</sub>) δ 9.68 (br, 1H), 9.62 (s, 1H), 9.38 (br, 1H), 8.30 (s, 1H), 8.08 (d, *J* = 7.8 Hz, 1H), 7.36 (m, 1H), 7.29 (dd, *J* = 7.2, 7.2 Hz, 2H), 7.23 (m, 2H), 6.76 (d, *J* = 7.2 Hz, 1H), 6.55 (dd, *J* = 16.8, 10.8 Hz, 1H), 6.39 (d, *J* = 5.4 Hz, 1H), 6.19 (d, *J* = 16.8 Hz, 1H), 5.69 (d, *J* = 10.8 Hz, 1H), 3.66 (m, 2H), 3.50 (m, 2H), 3.15 (m, 2H), 2.86 (s, 3H), 2.84 (m, 2H). MS (ESI) *m/z* 431 (M+H)<sup>+</sup>.

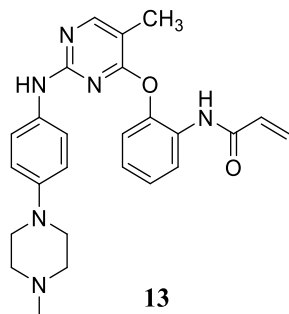

***N*-(2-((5-methyl-2-((4-(4-methylpiperazin-1-yl)phenyl)amino)pyrimidin-4-**

**yl)oxy)phenyl)acrylamide (12).** <sup>1</sup>H NMR (600 MHz, DMSO-*d*<sub>6</sub>) δ 9.68 (br, 1H), 9.52 (s, 1H), 9.20 (br, 1H), 8.17 (s, 1H), 8.04 (br, 1H), 7.29 (m, 3H), 7.25 (m, 2H), 6.71 (d, *J* = 9.0 Hz, 1H), 6.54 (dd, *J* = 16.8, 10.8 Hz, 1H), 6.19 (d, *J* = 16.8 Hz, 1H), 5.70 (d, *J* = 10.8 Hz, 1H), 3.63 (m, 2H), 3.50 (m, 2H), 3.15 (m, 2H), 2.85 (s, 3H), 2.83 (m, 2H), 2.17 (s, 3H). MS (ESI) *m/z* 445 (M+H)<sup>+</sup>.

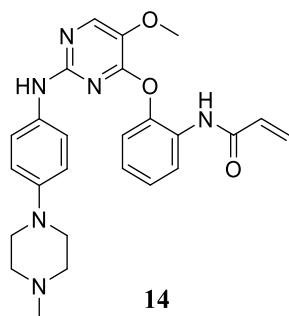

***N*-(2-((5-methoxy-2-((4-(4-methylpiperazin-1-yl)phenyl)amino)pyrimidin-4-**

**yl)oxy)phenyl)acrylamide (14).** <sup>1</sup>H NMR (600 MHz, DMSO-*d*<sub>6</sub>) δ 9.50 (br, 1H), 9.59 (s, 1H), 9.06 (br, 1H), 8.16 (s, 1H), 8.09 (br, 1H), 7.29 (m, 3H), 7.23 (m, 1H), 6.71 (d, *J* = 9.0 Hz, 1H), 6.58 (dd, *J* = 16.8, 10.8 Hz, 1H), 6.20 (d, *J* = 16.8 Hz, 1H), 5.69 (d, *J* = 10.8 Hz, 1H), 3.86 (s, 3H), 3.62 (m, 2H), 3.50 (m, 2H), 3.15 (m, 2H), 2.86 (s, 3H), 2.82 (m, 2H). MS (ESI) *m/z* 461 (M+H)<sup>+</sup>.

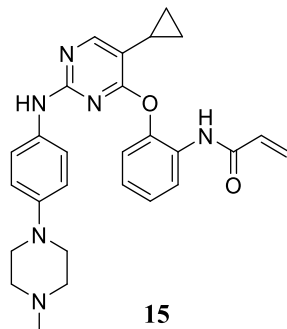

***N*-(2-((5-cyclopropyl-2-((4-(4-methylpiperazin-1-yl)phenyl)amino)pyrimidin-4-**

**yl)oxy)phenyl)acrylamide (15).** <sup>1</sup>H NMR (600 MHz, DMSO-*d*<sub>6</sub>) δ 9.67 (br, 1H), 9.50 (s, 1H), 9.21 (br, 1H), 8.02 (s, 1H), 7.97 (d, *J* = 7.8 Hz, 1H), 7.28 (m, 3H), 7.24 (m, 1H), 6.68 (d, *J* = 8.4 Hz, 1H), 6.52 (dd, *J* = 16.8, 10.8 Hz, 1H), 6.18 (d, *J* = 16.8 Hz, 1H), 5.68 (d, *J* = 10.8 Hz, 1H), 3.61 (m, 2H), 3.48 (m, 2H), 3.12 (m, 2H), 2.83 (s, 3H), 2.82 (m, 2H), 1.94 (m, 1H), 0.83 (m, 2H), 0.74 (m, 2H). MS (ESI) *m/z* 471 (M+H)<sup>+</sup>.

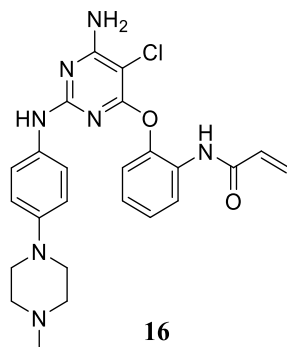

***N*-(2-((6-amino-5-chloro-2-((4-(4-methylpiperazin-1-yl)phenyl)amino)pyrimidin-4-**

**yl)oxy)phenyl)acrylamide (16).** <sup>1</sup>H NMR (600 MHz, DMSO-*d*<sub>6</sub>) δ 9.67 (br, 1H), 9.49 (s, 1H), 8.81 (s, 1H), 8.07 (br, 1H), 7.31 (m, 2H), 7.22 (d, *J* = 7.8 Hz, 1H), 7.15 (m, 2H), 6.82 (m, 1H), 6.67 (d, *J* = 7.8 Hz, 2H), 6.61 (dd, *J* = 16.8, 10.8 Hz, 1H), 6.19 (d, *J* = 16.8 Hz, 1H), 5.68 (d, *J* = 10.8 Hz, 1H), 3.60 (m, 2H), 3.48 (m, 2H), 3.12 (m, 2H), 2.83 (s, 3H), 2.81 (m, 2H). MS (ESI) *m/z* 480 (M+H)<sup>+</sup>.

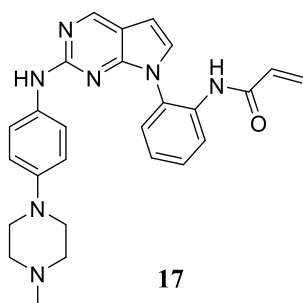

***N*-(2-(2-((4-(4-methylpiperazin-1-yl)phenyl)amino)-7*H*-pyrrolo[2,3-*d*]pyrimidin-7-**

**yl)phenyl)acrylamide (17).** <sup>1</sup>H NMR (600 MHz, DMSO-*d*<sub>6</sub>) δ 9.56 (s, 1H), 9.21 (s, 1H), 8.73 (s, 1H), 7.94 (d, *J* = 7.8 Hz, 1H), 7.59 (d, *J* = 8.4 Hz, 2H), 7.51 (d, *J* = 7.8 Hz, 1H), 7.48 (dd, *J* = 7.8, 7.8 Hz, 1H), 7.48 (dd, *J* = 7.8, 7.8 Hz, 1H), 7.19 (d, *J* = 3.6 Hz, 1H), 6.82 (d, *J* = 9.0 Hz, 1H), 6.62 (d, *J* = 3.6 Hz, 1H), 6.27 (dd, *J* = 16.8, 10.8 Hz, 1H), 6.11 (d, *J* = 16.8 Hz, 1H), 5.62 (d, *J* = 10.8 Hz, 1H), 3.13 (m, 4H), 3.89 (m, 4H), 2.54 (m, 3H). MS (ESI) *m/z* 454 (M+H)<sup>+</sup>.

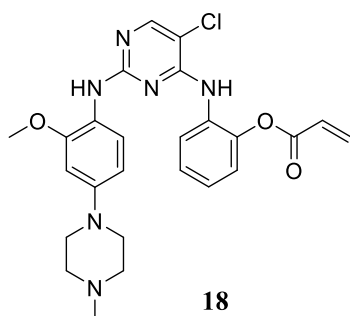

**2-((5-chloro-2-((2-methoxy-4-(4-methylpiperazin-1-yl)phenyl)amino)pyrimidin-4-**

**yl)amino)phenyl acrylate (12).** <sup>1</sup>H NMR (600 MHz, DMSO-*d*<sub>6</sub>) δ 9.22 (br, 1H), 8.66 (br, 1H), 8.10 (s, 1H), 7.70 (br, 1H), 7.37 (d, *J* = 7.2 Hz, 2H), 7.33 (m, 3H), 6.80 (m, 2H), 6.61 (s, 1H), 6.39 (d, *J* = 16.8 Hz, 1H), 6.34 (d, *J* = 7.2 Hz, 1H), 6.27 (dd, *J* = 16.8, 10.8 Hz, 1H), 6.05 (d, *J* = 10.8 Hz, 1H), 3.79 (s, 3H), 3.48 (m, 4H), 2.74 (m, 4H), 2.43 (m, 3H). MS (ESI) *m/z* 495 (M+H)<sup>+</sup>.

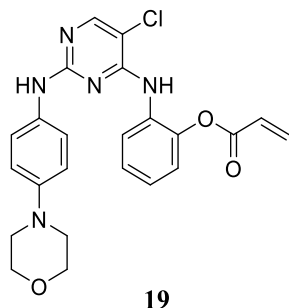

**2-((5-chloro-2-((4-morpholinophenyl)amino)pyrimidin-4-yl)amino)phenyl acrylate (19).**  $^1\text{H}$  NMR (600 MHz,  $\text{DMSO-}d_6$ )  $\delta$  9.68 (br, 1H), 9.52 (s, 1H), 9.20 (br, 1H), 8.17 (s, 1H), 8.04 (br, 1H), 7.29 (m, 3H), 7.25 (m, 2H), 6.71 (d,  $J = 9.0$  Hz, 1H), 6.39 (d,  $J = 16.8$  Hz, 1H), 6.28 (dd,  $J = 16.8, 10.8$  Hz, 1H), 6.08 (d,  $J = 10.8$  Hz, 1H), 3.75 (m, 4H), 3.50 (m, 4H). MS (ESI)  $m/z$  452 (M+H) $^+$ .

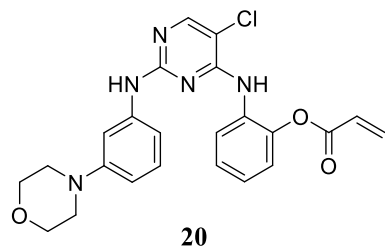

**2-((5-chloro-2-((3-morpholinophenyl)amino)pyrimidin-4-yl)amino)phenyl acrylate (20).**  $^1\text{H}$  NMR (600 MHz,  $\text{DMSO-}d_6$ )  $\delta$  9.21 (br, 1H), 8.67 (s, 1H), 8.14 (s, 1H), 7.68 (m, 1H), 7.32 (s, 1H), 7.31 (m, 2H), 7.08 (br, 1H), 7.03 (d,  $J = 8.4$  Hz, 1H), 6.97 (dd,  $J = 8.4, 8.4$  Hz, 1H), 6.52 (d,  $J = 8.4$ , 1H), 6.39 (d,  $J = 16.8$  Hz, 1H), 6.27 (dd,  $J = 16.8, 10.8$  Hz, 1H), 6.07 (d,  $J = 10.8$  Hz, 1H), 3.67 (m, 4H), 2.90 (m, 4H). MS (ESI)  $m/z$  452 (M+H) $^+$ .

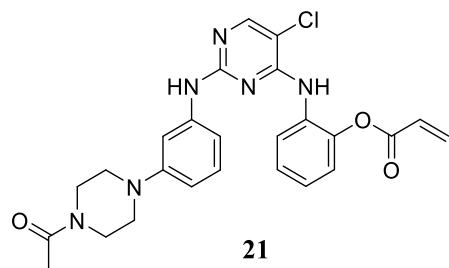

**2-((2-((3-(4-acetylpiperazin-1-yl)phenyl)amino)-5-chloropyrimidin-4-yl)amino)phenyl**

**acrylate (21).**  $^1\text{H NMR}$  (600 MHz,  $\text{DMSO-}d_6$ )  $\delta$  9.15 (br, 1H), 8.57 (s, 1H), 8.13 (s, 1H), 7.70 (br, 1H), 7.30 (m, 3H), 7.09 (br, 1H), 7.05 (d,  $J = 8.4$  Hz, 1H), 6.96 (dd,  $J = 8.4, 7.8$  Hz, 1H), 6.52 (d,  $J = 8.4$ , 1H), 6.39 (d,  $J = 16.8$  Hz, 1H), 6.27 (dd,  $J = 16.8, 10.8$  Hz, 1H), 6.07 (d,  $J = 10.8$  Hz, 1H), 3.51 (m, 4H), 2.96 (m, 2H), 2.89 (m, 2H), 2.03 (s, 3H). MS (ESI)  $m/z$  493 ( $\text{M}+\text{H}$ ) $^+$ .

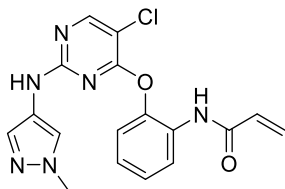

22

***N*-2-((5-chloro-2-((1-methyl-1*H*-pyrazol-4-yl)amino)pyrimidin-4-yl)oxy)phenyl)acrylamide**

**(22).**  $^1\text{H NMR}$  (600 MHz,  $\text{DMSO-}d_6$ )  $\delta$  9.72 (br, 1H), 9.60 (s, 1H), 8.37 (s, 1H), 8.10 (br, 1H), 7.41 (br, 1H), 7.30 (m, 2H), 7.05 (s, 1H), 6.75 (s, 1H), 6.53 (m, 1H), 6.20 (d,  $J = 16.8$  Hz, 1H), 5.70 (d,  $J = 10.8$  Hz, 1H), 3.53 (m, 3H). MS (ESI)  $m/z$  371 ( $\text{M}+\text{H}$ ) $^+$ .

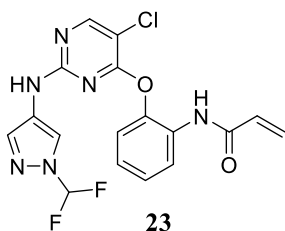

23

***N*-2-((5-chloro-2-((1-(difluoromethyl)-1*H*-pyrazol-4-yl)amino)pyrimidin-4-**

**yl)oxy)phenyl)acrylamide (23).** MS (ESI)  $m/z$  407 ( $\text{M}+\text{H}$ ) $^+$ .

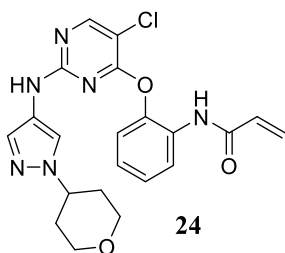

24

***N*-2-((5-chloro-2-((1-(tetrahydro-2*H*-pyran-4-yl)-1*H*-pyrazol-4-yl)amino)pyrimidin-4-yl)oxy)phenyl)acrylamide (22).** <sup>1</sup>H NMR (600 MHz, DMSO-*d*<sub>6</sub>) δ 9.76 (br, 1H), 9.61 (s, 1H), 8.38 (s, 1H), 8.10 (br, 1H), 7.41 (br, 1H), 7.31 (m, 2H), 7.13 (s, 1H), 6.91 (s, 1H), 6.53 (m, 1H), 6.19 (d, *J* = 16.8 Hz, 1H), 5.70 (d, *J* = 10.8 Hz, 1H), 3.95 (m, 5H), 3.44 (m, 4H). MS (ESI) *m/z* 441 (M+H)<sup>+</sup>.

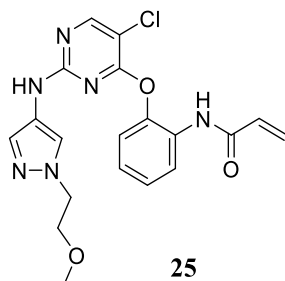

***N*-2-((5-chloro-2-((1-(2-methoxyethyl)-1*H*-pyrazol-4-yl)amino)pyrimidin-4-yl)oxy)phenyl)acrylamide (25).** <sup>1</sup>H NMR (600 MHz, DMSO-*d*<sub>6</sub>) δ 9.74 (br, 1H), 9.59 (s, 1H), 8.38 (s, 1H), 8.10 (br, 1H), 7.38 (br, 1H), 7.30 (m, 2H), 7.17 (br, 1H), 6.84 (br, 1H), 6.54 (m, 1H), 6.20 (d, *J* = 16.8 Hz, 1H), 5.70 (d, *J* = 10.8 Hz, 1H), 3.90 (m, 2H), 3.50 (m, 2H), 3.18 (s, 3H). MS (ESI) *m/z* 415 (M+H)<sup>+</sup>.

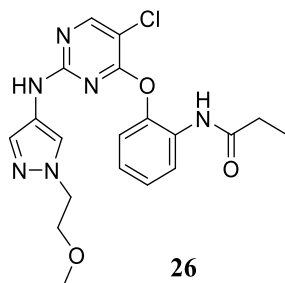

***N*-2-((5-chloro-2-((1-(2-methoxyethyl)-1*H*-pyrazol-4-yl)amino)pyrimidin-4-yl)oxy)phenyl)propionamide (26).** <sup>1</sup>H NMR (600 MHz, DMSO-*d*<sub>6</sub>) δ 9.71 (br, 1H), 9.31 (s, 1H), 8.37 (s, 1H), 7.95 (br, 1H), 7.35 (br, 1H), 7.27 (m, 2H), 7.08 (br, 1H), 6.83 (br, 1H), 3.89 (m, 2H), 3.49 (m, 2H), 3.18 (s, 3H), 2.26 (m, 2H), 0.96 (m, 3H). MS (ESI) *m/z* 417 (M+H)<sup>+</sup>.

**Mass spectrometry procedures.** TAK1 protein (20 µg) was labeled with an equimolar amount of inhibitor or DMSO for 1 hour at room temperature. Analysis of intact protein was performed as described [1]. Briefly, ~5 µg protein was injected onto a self-packed reversed-phase column (500 µm inner diameter, 5 cm of POROS 50R2 resin). After washing to remove salts, TAK1 was eluted with an HPLC gradient (0%–100% B in 1 min, A = 0.2 M acetic acid in water, B = 0.2 M acetic acid in acetonitrile, flow rate = 10 µl/min) into a linear ion trap mass spectrometer (LTQ, Thermo Fisher Scientific, San Jose, CA). Data were acquired in profile mode scanning m/z 300–2000, and mass spectra were deconvoluted using MagTran software (version 1.03b2) [2]. The site of covalent modification was determined using nanoLC-MS. Desalted proteins were reduced with tris(2-carboxyethyl)phosphine (10 mM, 30 minutes room temperature), alkylated with methylmethanethiosulfonate (20 mM, 30 minutes room temperature), and digested with trypsin at 37 °C overnight. Digests were analyzed by nanoLC-ESI-MS as described with modifications [3]. Peptides were loaded onto a self-packed pre-column (4 cm POROS10R2), resolved on an analytical column (30 µm I.D., packed with 50 cm C18) and eluted into the mass spectrometer (hybrid quadrupole-orbitrap mass spectrometer, QExactiv HF, Thermo Fisher Scientific) using an HPLC gradient (Waters NanoAcquity, Milford, MA; 0%–35% B in 60 min, A = 0.2 M acetic acid in water, B = 0.2 M acetic acid in acetonitrile, flow rate = ~30 nl/min). The instrument was operated in data dependent mode such that the top 10 most abundant precursors were subjected to MS/MS (image current detection, normalized collision energy 27%, resolution=15,000). Raw data files were converted to .mgf using in-house software [4] and searched using Mascot 2.2.1 against a forward-reverse human refseq database. Search parameters specified variable oxidation of methionine, variable compound 2 modification of cysteine, and fixed methylthio modification of cysteine (i.e. cysteines are considered methylthio or inhibitor labeled).



### **Covalent inhibition kinetics using Mobility Shift Assay:**

$K_{inact}/K_i$  measurements were determined from kinetic TAK1 enzyme activity data obtained using a peptide substrate mobility shift assay similar to previous descriptions [5]. Reactions containing 50 nM TAK1-TAB1 protein, 1  $\mu$ M fluorescently labeled LRRKtide (FAM-RLGRDKYKTLRQIRQ), 100  $\mu$ M ATP, and inhibitor were performed in 100 mM Hepes pH 7.3, 0.015% Brij-35, 0.004% Tween-20, 10 mM  $MgCl_2$ . Peptides were separated and detected using a LabChip EZ Reader® (PerkinElmer). Separation buffer consisted of 100 mM Hepes pH 7.3, 0.015% Brij-35, 1 mM disodium EDTA, 0.1% coating reagent 3, 5% DMSO and 1X coating reagent 8. Phosphorylated and non-phosphorylated peaks were analyzed using LabChip EZ Reader Software V3.0. Assay data were exported to the DynaFit software package [6] to obtain  $K_{inact}/K_i$  values as described [7].

## Supplementary Tables

**Table S1.** X-ray reflection data and model refinement statistics

|                                        | <b>C-1</b><br><b>(5J9L)</b>      | <b>C-2</b><br><b>(5J8I)</b>         | <b>C-5</b><br><b>(5J7S)</b>      | <b>C-7</b><br><b>(5JH6)</b>     | <b>C-10</b><br><b>(5E7R)</b>    | <b>C-22</b><br><b>(5JK3)</b>    |
|----------------------------------------|----------------------------------|-------------------------------------|----------------------------------|---------------------------------|---------------------------------|---------------------------------|
| <b>Data Collection</b>                 |                                  |                                     |                                  |                                 |                                 |                                 |
| Space Group                            | I2 2 2                           |                                     |                                  |                                 |                                 |                                 |
| Unit Cell Dimensions                   |                                  |                                     |                                  |                                 |                                 |                                 |
| <i>a, b, c</i> (Å)                     | 58.208,<br>133.407,<br>144.898   | 58.248,<br>133.343,<br>145.039      | 58.234,<br>134.06,<br>146.81     | 58.303,<br>133.58,<br>145.70    | 58.41,<br>133.422,<br>145.769   | 58.272,<br>133.59,<br>144.20    |
| $\alpha, \beta, \gamma$ (°)            | 90.0, 90.0, 90.0                 |                                     |                                  |                                 |                                 |                                 |
| Wavelength (Å)                         | 0.97926                          | 0.97932                             | 0.97932                          | 0.97918                         | 0.97918                         | 0.97932                         |
| Resolution (Å)                         | 49.01 -<br>2.75 (2.85<br>- 2.75) | 49.08 -<br>2.40<br>(2.49 -<br>2.40) | 49.50 -<br>2.37 (2.42<br>- 2.37) | 50.0 -<br>2.34 (2.38<br>- 2.34) | 50.0 - 2.10<br>(2.14 -<br>2.10) | 50.0 - 2.40<br>(2.44 -<br>2.40) |
| Unique Reflections                     | 13,998                           | 21,238                              | 23,015                           | 22,477                          | 32,105                          | 21,503                          |
| Redundancy                             | 5.0 (4.4)                        | 8.3 (5.6)                           | 9.9 (6.4)                        | 8.9 (5.9)                       | 8.0 (6.4)                       | 5.9 (4.8)                       |
| Completeness                           | 92.9<br>(76.0)                   | 96.3<br>(80.1)                      | 96.3<br>(90.9)                   | 96.8<br>(89.9)                  | 96.7 (98.4)                     | 93.7 (69.7)                     |
| R <sub>merge</sub>                     | 0.081<br>(0.579)                 | 0.124<br>(1.571)                    | 0.129<br>(1.486)                 | 0.106<br>(0.901)                | 0.243 (NA)                      | 0.090<br>(0.923)                |
| $\langle I/\sigma \rangle$             | 15.2 (1.6)                       | 18.9 (1.1)                          | 17.8<br>(0.87)                   | 19.27<br>(1.25)                 | 6.3 (1.68)                      | 17.2 (2.0)                      |
| Wilson B-factor (Å <sup>2</sup> )      | 58.7                             | 53.9                                | 48.9                             | 55.5                            | 38.7                            | 47.8                            |
| <b>Refinement and Model Statistics</b> |                                  |                                     |                                  |                                 |                                 |                                 |
| Refinement Resolution<br>(Å)           | 49.01 -<br>2.75                  | 49.08 -<br>2.40                     | 49.50 -<br>2.37                  | 45.64 -<br>2.36                 | 42.15 -<br>2.11                 | 35.38 -<br>2.40                 |
| No. of reflections used                | 13,979                           | 21,171                              | 22,973                           | 22,432                          | 32,065                          | 21,465                          |
| Reflections for R-Free                 | 703 (5%)                         | 1057<br>(5%)                        | 1150<br>(5%)                     | 1088 (5%)                       | 1281 (4%)                       | 1071 (5%)                       |
| R-work                                 | 0.212                            | 0.223                               | 0.239                            | 0.225                           | 0.220                           | 0.234                           |

|                                    |                  |                  |                  |                  |                  |                  |
|------------------------------------|------------------|------------------|------------------|------------------|------------------|------------------|
| R-free                             | 0.243            | 0.249            | 0.246            | 0.252            | 0.245            | 0.265            |
| RMS deviations                     |                  |                  |                  |                  |                  |                  |
| Bond lengths (Å)                   | 0.003            | 0.003            | 0.003            | 0.004            | 0.007            | 0.003            |
| Bond Angles (°)                    | 0.55             | 0.63             | 0.58             | 0.557            | 0.956            | 0.569            |
| Average B-factor (Å <sup>2</sup> ) | 79               | 94               | 95               | 97               | 69               | 88               |
| Ramachandran plot (%)              |                  |                  |                  |                  |                  |                  |
| Favored/allowed/disallowed         | 94.0 / 5.9 / 0.0 | 92.1 / 7.9 / 0.0 | 95.8 / 4.2 / 0.0 | 97.5 / 2.5 / 0.0 | 95.4 / 4.6 / 0.0 | 94.5 / 5.5 / 0.0 |

**Table S2-7.** KINOMEscan kinase selectivity profiles for **7**, **23**, **25** and **5Z7**. All three inhibitors were profiled at a concentration of 1  $\mu$ M against a diverse panel of more than 456 kinases (354 non-mutants kinases), whereas **5Z7** was profiled at both 1 and 10  $\mu$ M. Scores for primary screen hits are reported as a percent of the DMSO control (% control). For kinases where no score is shown, no measurable binding was detected. The lower the score, the lower the K<sub>d</sub> is likely to be, such that scores of zero represent strong hits. Scores are related to the probability of a hit but are not strictly an affinity measurement. Those hits with a DFG-1 cysteine were highlighted.

**Table S2.** KINOMEscan kinase selectivity profiles for **5**.

| Kinases                       | Scores | Kinases  | Scores |
|-------------------------------|--------|----------|--------|
| AAK1                          | 11     | LZK      | 12     |
| ABL1(E255K)-phosphorylated    | 0.75   | MAK      | 100    |
| ABL1(F317I)-nonphosphorylated | 40     | MAP3K1   | 94     |
| ABL1(F317I)-phosphorylated    | 36     | MAP3K15  | 72     |
| ABL1(F317L)-nonphosphorylated | 16     | MAP3K2   | 11     |
| ABL1(F317L)-phosphorylated    | 20     | MAP3K3   | 18     |
| ABL1(H396P)-nonphosphorylated | 0      | MAP3K4   | 5.4    |
| ABL1(H396P)-phosphorylated    | 1.1    | MAP4K2   | 27     |
| ABL1(M351T)-phosphorylated    | 3.9    | MAP4K3   | 4.9    |
| ABL1(Q252H)-nonphosphorylated | 0      | MAP4K4   | 59     |
| ABL1(Q252H)-phosphorylated    | 1.1    | MAP4K5   | 68     |
| ABL1(T315I)-nonphosphorylated | 0      | MAPKAPK2 | 100    |

|                            |      |             |     |
|----------------------------|------|-------------|-----|
| ABL1(T315I)-phosphorylated | 0.7  | MAPKAPK5    | 0   |
| ABL1(Y253F)-phosphorylated | 1.1  | MARK1       | 15  |
| ABL1-nonphosphorylated     | 0.8  | MARK2       | 17  |
| ABL1-phosphorylated        | 1.1  | MARK3       | 18  |
| ABL2                       | 18   | MARK4       | 19  |
| ACVR1                      | 2.3  | MAST1       | 75  |
| ACVR1B                     | 11   | MEK1        | 0   |
| ACVR2A                     | 55   | MEK2        | 0   |
| ACVR2B                     | 87   | MEK3        | 3.5 |
| ACVRL1                     | 18   | MEK4        | 3.5 |
| ADCK3                      | 97   | MEK5        | 0.1 |
| ADCK4                      | 89   | MEK6        | 23  |
| AKT1                       | 100  | MELK        | 30  |
| AKT2                       | 100  | MERTK       | 4.8 |
| AKT3                       | 100  | MET         | 23  |
| ALK                        | 53   | MET(M1250T) | 1.6 |
| ALK(C1156Y)                | 12   | MET(Y1235D) | 23  |
| ALK(L1196M)                | 9.6  | MINK        | 29  |
| AMPK-alpha1                | 2.4  | MKK7        | 22  |
| AMPK-alpha2                | 5.5  | MKNK1       | 74  |
| ANKK1                      | 96   | MKNK2       | 4.4 |
| ARK5                       | 0.9  | MLCK        | 100 |
| ASK1                       | 100  | MLK1        | 15  |
| ASK2                       | 91   | MLK2        | 45  |
| AURKA                      | 1.2  | MLK3        | 61  |
| AURKB                      | 0.1  | MRCKA       | 100 |
| AURKC                      | 0.2  | MRCKB       | 100 |
| AXL                        | 3    | MST1        | 49  |
| BIKE                       | 2.6  | MST1R       | 63  |
| BLK                        | 1.2  | MST2        | 84  |
| BMPR1A                     | 70   | MST3        | 85  |
| BMPR1B                     | 0.15 | MST4        | 98  |
| BMPR2                      | 87   | MTOR        | 100 |
| BMX                        | 29   | MUSK        | 15  |
| BRAF                       | 90   | MYLK        | 79  |
| BRAF(V600E)                | 89   | MYLK2       | 55  |
| BRK                        | 1.6  | MYLK4       | 96  |
| BRSK1                      | 30   | MYO3A       | 89  |
| BRSK2                      | 30   | MYO3B       | 42  |
| BTK                        | 3.1  | NDR1        | 39  |
| BUB1                       | 100  | NDR2        | 42  |
| CAMK1                      | 73   | NEK1        | 100 |
| CAMK1B                     | 78   | NEK10       | 88  |
| CAMK1D                     | 65   | NEK11       | 57  |
| CAMK1G                     | 93   | NEK2        | 75  |
| CAMK2A                     | 96   | NEK3        | 52  |

|                     |     |                       |     |
|---------------------|-----|-----------------------|-----|
| CAMK2B              | 97  | NEK4                  | 94  |
| CAMK2D              | 94  | NEK5                  | 100 |
| CAMK2G              | 96  | NEK6                  | 100 |
| CAMK4               | 100 | NEK7                  | 98  |
| CAMKK1              | 29  | NEK9                  | 95  |
| CAMKK2              | 15  | NIK                   | 100 |
| CASK                | 92  | NIM1                  | 67  |
| CDC2L1              | 5.4 | NLK                   | 93  |
| CDC2L2              | 90  | OSR1                  | 100 |
| CDC2L5              | 100 | p38-alpha             | 96  |
| CDK11               | 100 | p38-beta              | 100 |
| CDK2                | 98  | p38-delta             | 91  |
| CDK3                | 89  | p38-gamma             | 61  |
| CDK4                | 95  | PAK1                  | 21  |
| CDK4-cyclinD1       | 91  | PAK2                  | 59  |
| CDK4-cyclinD3       | 58  | PAK3                  | 0   |
| CDK5                | 61  | PAK4                  | 65  |
| CDK7                | 10  | PAK6                  | 77  |
| CDK8                | 91  | PAK7                  | 58  |
| CDK9                | 9.4 | PCTK1                 | 100 |
| CDKL1               | 33  | PCTK2                 | 87  |
| CDKL2               | 1.4 | PCTK3                 | 91  |
| <b>CDKL3</b>        | 0   | <b>PDGFRA</b>         | 0.5 |
| CDKL5               | 100 | <b>PDGFRB</b>         | 0.1 |
| CHEK1               | 76  | PDPK1                 | 72  |
| CHEK2               | 2   | PFCDPK1(P.falciparum) | 47  |
| CIT                 | 92  | PFPK5(P.falciparum)   | 100 |
| CLK1                | 2.3 | PFTAIRE2              | 89  |
| CLK2                | 8.2 | PFTK1                 | 90  |
| CLK3                | 57  | PHKG1                 | 22  |
| CLK4                | 7.8 | PHKG2                 | 21  |
| CSF1R               | 11  | PIK3C2B               | 90  |
| CSF1R-autoinhibited | 17  | PIK3C2G               | 92  |
| CSK                 | 46  | PIK3CA                | 97  |
| CSNK1A1             | 79  | PIK3CA(C420R)         | 99  |
| CSNK1A1L            | 95  | PIK3CA(E542K)         | 76  |
| CSNK1D              | 71  | PIK3CA(E545A)         | 94  |
| CSNK1E              | 100 | PIK3CA(E545K)         | 64  |
| CSNK1G1             | 98  | PIK3CA(H1047L)        | 74  |
| CSNK1G2             | 81  | PIK3CA(H1047Y)        | 100 |
| CSNK1G3             | 98  | PIK3CA(I800L)         | 100 |
| CSNK2A1             | 39  | PIK3CA(M1043I)        | 87  |
| CSNK2A2             | 30  | PIK3CA(Q546K)         | 77  |
| CTK                 | 89  | PIK3CB                | 57  |
| DAPK1               | 59  | PIK3CD                | 99  |
| DAPK2               | 95  | PIK3CG                | 77  |

|                           |     |                      |     |
|---------------------------|-----|----------------------|-----|
| DAPK3                     | 69  | PIK4CB               | 97  |
| DCAMKL1                   | 47  | PIKFYVE              | 76  |
| DCAMKL2                   | 65  | PIM1                 | 86  |
| DCAMKL3                   | 100 | PIM2                 | 100 |
| DDR1                      | 8.4 | PIM3                 | 96  |
| DDR2                      | 27  | PIP5K1A              | 7.8 |
| DLK                       | 8.4 | PIP5K1C              | 91  |
| DMPK                      | 100 | PIP5K2B              | 7.1 |
| DMPK2                     | 94  | PIP5K2C              | 69  |
| DRAK1                     | 44  | PKAC-alpha           | 77  |
| DRAK2                     | 100 | PKAC-beta            | 100 |
| DYRK1A                    | 79  | PKMYT1               | 97  |
| DYRK1B                    | 49  | PKN1                 | 61  |
| DYRK2                     | 56  | PKN2                 | 51  |
| EGFR                      | 39  | PKNB(M.tuberculosis) | 6   |
| EGFR(E746-A750del)        | 36  | PLK1                 | 77  |
| EGFR(G719C)               | 90  | PLK2                 | 59  |
| EGFR(G719S)               | 81  | PLK3                 | 65  |
| EGFR(L747-E749del, A750P) | 34  | PLK4                 | 0.1 |
| EGFR(L747-S752del, P753S) | 54  | PRKCD                | 94  |
| EGFR(L747-T751del,Sins)   | 83  | PRKCE                | 86  |
| EGFR(L858R)               | 37  | PRKCH                | 100 |
| EGFR(L858R,T790M)         | 8.1 | PRKCI                | 69  |
| EGFR(L861Q)               | 52  | PRKCQ                | 67  |
| EGFR(S752-I759del)        | 85  | PRKD1                | 54  |
| EGFR(T790M)               | 7   | PRKD2                | 15  |
| EIF2AK1                   | 80  | PRKD3                | 24  |
| EPHA1                     | 21  | PRKG1                | 55  |
| EPHA2                     | 89  | PRKG2                | 75  |
| EPHA3                     | 57  | PRKR                 | 47  |
| EPHA4                     | 99  | PRKX                 | 100 |
| EPHA5                     | 100 | PRP4                 | 67  |
| EPHA6                     | 72  | PYK2                 | 9.9 |
| EPHA7                     | 97  | QSK                  | 100 |
| EPHA8                     | 97  | RAF1                 | 100 |
| EPHB1                     | 68  | RET                  | 1.1 |
| EPHB2                     | 97  | RET(M918T)           | 2.4 |
| EPHB3                     | 92  | RET(V804L)           | 1   |
| EPHB4                     | 94  | RET(V804M)           | 1.4 |
| EPHB6                     | 2.5 | RIOK1                | 5.7 |
| ERBB2                     | 72  | RIOK2                | 89  |
| ERBB3                     | 80  | RIOK3                | 11  |
| ERBB4                     | 43  | RIPK1                | 83  |
| ERK1                      | 23  | RIPK2                | 98  |
| ERK2                      | 15  | RIPK4                | 71  |
| ERK3                      | 3.6 | RIPK5                | 48  |

|                           |      |                               |      |
|---------------------------|------|-------------------------------|------|
| ERK4                      | 22   | ROCK1                         | 66   |
| ERK5                      | 29   | ROCK2                         | 44   |
| ERK8                      | 4.8  | ROS1                          | 12   |
| ERN1                      | 38   | RPS6KA4(Kin.Dom.1-N-terminal) | 17   |
| FAK                       | 3.4  | RPS6KA4(Kin.Dom.2-C-terminal) | 60   |
| FER                       | 16   | RPS6KA5(Kin.Dom.1-N-terminal) | 88   |
| FES                       | 67   | RPS6KA5(Kin.Dom.2-C-terminal) | 98   |
| FGFR1                     | 0.8  | RSK1(Kin.Dom.1-N-terminal)    | 7    |
| FGFR2                     | 7.6  | RSK1(Kin.Dom.2-C-terminal)    | 90   |
| FGFR3                     | 5.7  | RSK2(Kin.Dom.1-N-terminal)    | 1.2  |
| FGFR3(G697C)              | 8.6  | RSK2(Kin.Dom.2-C-terminal)    | 100  |
| FGFR4                     | 43   | RSK3(Kin.Dom.1-N-terminal)    | 4.3  |
| FGR                       | 2.6  | RSK3(Kin.Dom.2-C-terminal)    | 67   |
| <b>FLT1</b>               | 0.95 | RSK4(Kin.Dom.1-N-terminal)    | 20   |
| FLT3                      | 1.1  | RSK4(Kin.Dom.2-C-terminal)    | 85   |
| <b>FLT3(D835H)</b>        | 0.8  | S6K1                          | 19   |
| <b>FLT3(D835V)</b>        | 0    | SBK1                          | 6.3  |
| <b>FLT3(D835Y)</b>        | 0.2  | SGK                           | 29   |
| <b>FLT3(ITD)</b>          | 1    | SgK110                        | 8.9  |
| <b>FLT3(ITD,D835V)</b>    | 0    | SGK2                          | 90   |
| <b>FLT3(ITD,F691L)</b>    | 0    | SGK3                          | 67   |
| <b>FLT3(K663Q)</b>        | 0.15 | SIK                           | 1.1  |
| <b>FLT3(N841I)</b>        | 0    | SIK2                          | 8.2  |
| <b>FLT3(R834Q)</b>        | 0    | SLK                           | 0.2  |
| <b>FLT3-autoinhibited</b> | 0.5  | SNARK                         | 0.7  |
| <b>FLT4</b>               | 0    | SNRK                          | 73   |
| FRK                       | 24   | SRC                           | 0.2  |
| FYN                       | 16   | SRMS                          | 73   |
| GAK                       | 8.3  | SRPK1                         | 4.5  |
| GCN2(Kin.Dom.2,S808G)     | 1.9  | SRPK2                         | 94   |
| GRK1                      | 66   | SRPK3                         | 24   |
| GRK2                      | 89   | STK16                         | 1.3  |
| GRK3                      | 57   | STK33                         | 18   |
| GRK4                      | 32   | STK35                         | 55   |
| GRK7                      | 92   | STK36                         | 0.2  |
| GSK3A                     | 100  | STK39                         | 83   |
| GSK3B                     | 95   | SYK                           | 26   |
| HASPIN                    | 100  | <b>TAK1</b>                   | 0.95 |
| HCK                       | 3.7  | TAOK1                         | 44   |
| HIPK1                     | 24   | TAOK2                         | 100  |
| HIPK2                     | 25   | TAOK3                         | 62   |
| HIPK3                     | 33   | TBK1                          | 16   |
| HIPK4                     | 2.6  | TEC                           | 2.6  |

|                              |      |                              |     |
|------------------------------|------|------------------------------|-----|
| HPK1                         | 0.7  | TESK1                        | 69  |
| HUNK                         | 100  | TGFBR1                       | 24  |
| ICK                          | 93   | TGFBR2                       | 100 |
| IGF1R                        | 1.9  | TIE1                         | 4   |
| IKK-alpha                    | 81   | TIE2                         | 11  |
| IKK-beta                     | 83   | TLK1                         | 82  |
| IKK-epsilon                  | 16   | TLK2                         | 91  |
| INSR                         | 2.3  | TNIK                         | 30  |
| INSRR                        | 2.1  | TNK1                         | 0   |
| IRAK1                        | 0.4  | TNK2                         | 7.1 |
| IRAK3                        | 8.5  | TNNI3K                       | 100 |
| IRAK4                        | 7.8  | TRKA                         | 0   |
| ITK                          | 0.95 | TRKB                         | 0.4 |
| JAK1(JH1domain-catalytic)    | 47   | TRKC                         | 11  |
| JAK1(JH2domain-pseudokinase) | 3.8  | TRPM6                        | 100 |
| JAK2(JH1domain-catalytic)    | 0    | TSSK1B                       | 39  |
| JAK3(JH1domain-catalytic)    | 0    | TSSK3                        | 83  |
| JNK1                         | 0.95 | TTK                          | 6.1 |
| JNK2                         | 10   | TXK                          | 26  |
| JNK3                         | 0.8  | TYK2(JH1domain-catalytic)    | 12  |
| KIT                          | 0.05 | TYK2(JH2domain-pseudokinase) | 18  |
| KIT(A829P)                   | 0    | TYRO3                        | 44  |
| KIT(D816H)                   | 12   | ULK1                         | 11  |
| KIT(D816V)                   | 2.5  | ULK2                         | 22  |
| KIT(L576P)                   | 0.95 | ULK3                         | 1.2 |
| KIT(V559D)                   | 0    | VEGFR2                       | 0.3 |
| KIT(V559D,T670I)             | 1    | VPS34                        | 83  |
| KIT(V559D,V654A)             | 28   | VRK2                         | 92  |
| KIT-autoinhibited            | 0.5  | WEE1                         | 2.4 |
| LATS1                        | 30   | WEE2                         | 7.6 |
| LATS2                        | 41   | WNK1                         | 100 |
| LCK                          | 0.75 | WNK2                         | 100 |
| LIMK1                        | 16   | WNK3                         | 100 |
| LIMK2                        | 96   | WNK4                         | 100 |
| LKB1                         | 75   | YANK1                        | 70  |
| LOK                          | 0.1  | YANK2                        | 100 |
| LRRK2                        | 48   | YANK3                        | 100 |
| LRRK2(G2019S)                | 100  | YES                          | 0.6 |
| LTK                          | 41   | YSK1                         | 89  |
| LYN                          | 32   | YSK4                         | 0   |
| LZK                          | 12   | ZAK                          | 62  |
| MAK                          | 100  | ZAP70                        | 66  |



**Table S3.** KINOMEscan kinase selectivity profiles for **9**.

| <b>Kinase</b>                 | <b>Scores</b> | <b>Kinase</b> | <b>Scores</b> |
|-------------------------------|---------------|---------------|---------------|
| AAK1                          | 12            | MAK           | 94            |
| ABL1(E255K)-phosphorylated    | 0.4           | MAP3K1        | 72            |
| ABL1(F317I)-nonphosphorylated | 11            | MAP3K15       | 93            |
| ABL1(F317I)-phosphorylated    | 11            | MAP3K2        | 0.65          |
| ABL1(F317L)-nonphosphorylated | 2.4           | MAP3K3        | 0.5           |
| ABL1(F317L)-phosphorylated    | 2.6           | MAP3K4        | 9             |
| ABL1(H396P)-nonphosphorylated | 0             | MAP4K2        | 14            |
| ABL1(H396P)-phosphorylated    | 0.1           | MAP4K3        | 3.9           |
| ABL1(M351T)-phosphorylated    | 1.3           | MAP4K4        | 81            |
| ABL1(Q252H)-nonphosphorylated | 0             | MAP4K5        | 39            |
| ABL1(Q252H)-phosphorylated    | 0.15          | MAPKAPK2      | 100           |
| ABL1(T315I)-nonphosphorylated | 0             | MAPKAPK5      | 74            |
| ABL1(T315I)-phosphorylated    | 0.6           | MARK1         | 3.7           |
| ABL1(Y253F)-phosphorylated    | 0.1           | MARK2         | 14            |
| ABL1-nonphosphorylated        | 0             | MARK3         | 19            |
| ABL1-phosphorylated           | 0.2           | MARK4         | 12            |
| ABL2                          | 7.8           | MAST1         | 72            |
| ACVR1                         | 1.2           | MEK1          | 13            |
| ACVR1B                        | 4.7           | MEK2          | 7.8           |
| ACVR2A                        | 47            | MEK3          | 68            |
| ACVR2B                        | 58            | MEK4          | 92            |
| ACVRL1                        | 18            | MEK5          | 5.2           |
| ADCK3                         | 100           | MEK6          | 100           |
| ADCK4                         | 99            | MELK          | 26            |
| AKT1                          | 100           | MERTK         | 11            |
| AKT2                          | 100           | MET           | 14            |
| AKT3                          | 100           | MET(M1250T)   | 3.8           |
| ALK                           | 11            | MET(Y1235D)   | 12            |
| ALK(C1156Y)                   | 4.5           | MINK          | 32            |
| ALK(L1196M)                   | 7.5           | MKK7          | 100           |
| AMPK-alpha1                   | 1.2           | MKNK1         | 86            |
| AMPK-alpha2                   | 4.7           | MKNK2         | 24            |
| ANKK1                         | 15            | MLCK          | 100           |
| ARK5                          | 0.6           | MLK1          | 21            |
| ASK1                          | 100           | MLK2          | 80            |
| ASK2                          | 80            | MLK3          | 88            |
| AURKA                         | 0.05          | MRCKA         | 100           |
| AURKB                         | 0.15          | MRCKB         | 100           |
| AURKC                         | 0.2           | MST1          | 51            |
| AXL                           | 1.1           | MST1R         | 36            |

|               |      |                       |     |
|---------------|------|-----------------------|-----|
| BIKE          | 2.4  | MST2                  | 73  |
| BLK           | 0.65 | MST3                  | 91  |
| BMPR1A        | 44   | MST4                  | 91  |
| BMPR1B        | 0    | MTOR                  | 100 |
| BMPR2         | 92   | MUSK                  | 6.7 |
| BMX           | 17   | MYLK                  | 61  |
| BRAF          | 83   | MYLK2                 | 47  |
| BRAF(V600E)   | 76   | MYLK4                 | 100 |
| BRK           | 0.15 | MYO3A                 | 99  |
| BRSK1         | 27   | MYO3B                 | 37  |
| BRSK2         | 26   | NDR1                  | 32  |
| BTK           | 0.25 | NDR2                  | 39  |
| BUB1          | 100  | NEK1                  | 100 |
| CAMK1         | 70   | NEK10                 | 34  |
| CAMK1B        | 28   | NEK11                 | 6.7 |
| CAMK1D        | 59   | NEK2                  | 82  |
| CAMK1G        | 93   | NEK3                  | 56  |
| CAMK2A        | 97   | NEK4                  | 66  |
| CAMK2B        | 94   | NEK5                  | 91  |
| CAMK2D        | 96   | NEK6                  | 100 |
| CAMK2G        | 92   | NEK7                  | 76  |
| CAMK4         | 100  | NEK9                  | 79  |
| CAMKK1        | 29   | NIK                   | 95  |
| CAMKK2        | 13   | NIM1                  | 66  |
| CASK          | 71   | NLK                   | 92  |
| CDC2L1        | 95   | OSR1                  | 100 |
| CDC2L2        | 100  | p38-alpha             | 100 |
| CDC2L5        | 100  | p38-beta              | 100 |
| CDK11         | 100  | p38-delta             | 100 |
| CDK2          | 98   | p38-gamma             | 74  |
| CDK3          | 74   | PAK1                  | 27  |
| CDK4          | 88   | PAK2                  | 68  |
| CDK4-cyclinD1 | 30   | PAK3                  | 0   |
| CDK4-cyclinD3 | 39   | PAK4                  | 59  |
| CDK5          | 89   | PAK6                  | 63  |
| CDK7          | 3.4  | PAK7                  | 48  |
| CDK8          | 97   | PCK1                  | 100 |
| CDK9          | 98   | PCK2                  | 86  |
| CDKL1         | 100  | PCK3                  | 98  |
| CDKL2         | 8.3  | PDGFRA                | 40  |
| CDKL3         | 86   | PDGFRB                | 5.3 |
| CDKL5         | 100  | PDPK1                 | 74  |
| CHEK1         | 61   | PFCDPK1(P.falciparum) | 32  |
| CHEK2         | 6.3  | PFPK5(P.falciparum)   | 99  |
| CIT           | 87   | PFTAIRE2              | 75  |
| CLK1          | 0.9  | PFTK1                 | 96  |

|                           |     |                      |     |
|---------------------------|-----|----------------------|-----|
| CLK2                      | 5.3 | PHKG1                | 25  |
| CLK3                      | 29  | PHKG2                | 19  |
| CLK4                      | 5.2 | PIK3C2B              | 90  |
| CSF1R                     | 3.7 | PIK3C2G              | 88  |
| CSF1R-autoinhibited       | 6.3 | PIK3CA               | 95  |
| CSK                       | 28  | PIK3CA(C420R)        | 99  |
| CSNK1A1                   | 67  | PIK3CA(E542K)        | 81  |
| CSNK1A1L                  | 98  | PIK3CA(E545A)        | 95  |
| CSNK1D                    | 95  | PIK3CA(E545K)        | 67  |
| CSNK1E                    | 96  | PIK3CA(H1047L)       | 83  |
| CSNK1G1                   | 97  | PIK3CA(H1047Y)       | 100 |
| CSNK1G2                   | 88  | PIK3CA(I800L)        | 90  |
| CSNK1G3                   | 95  | PIK3CA(M1043I)       | 76  |
| CSNK2A1                   | 44  | PIK3CA(Q546K)        | 88  |
| CSNK2A2                   | 15  | PIK3CB               | 62  |
| CTK                       | 80  | PIK3CD               | 100 |
| DAPK1                     | 93  | PIK3CG               | 87  |
| DAPK2                     | 93  | PIK4CB               | 90  |
| DAPK3                     | 73  | PIKFYVE              | 89  |
| DCAMKL1                   | 6.2 | PIM1                 | 94  |
| DCAMKL2                   | 16  | PIM2                 | 100 |
| DCAMKL3                   | 72  | PIM3                 | 100 |
| DDR1                      | 5.3 | PIP5K1A              | 13  |
| DDR2                      | 21  | PIP5K1C              | 87  |
| DLK                       | 5   | PIP5K2B              | 6.9 |
| DMPK                      | 100 | PIP5K2C              | 85  |
| DMPK2                     | 84  | PKAC-alpha           | 88  |
| DRAK1                     | 97  | PKAC-beta            | 94  |
| DRAK2                     | 100 | PKMYT1               | 76  |
| DYRK1A                    | 84  | PKN1                 | 35  |
| DYRK1B                    | 63  | PKN2                 | 49  |
| DYRK2                     | 40  | PKNB(M.tuberculosis) | 5   |
| EGFR                      | 24  | PLK1                 | 87  |
| EGFR(E746-A750del)        | 12  | PLK2                 | 70  |
| EGFR(G719C)               | 94  | PLK3                 | 78  |
| EGFR(G719S)               | 75  | PLK4                 | 0   |
| EGFR(L747-E749del, A750P) | 10  | PRKCD                | 94  |
| EGFR(L747-S752del, P753S) | 31  | PRKCE                | 69  |
| EGFR(L747-T751del,Sins)   | 40  | PRKCH                | 100 |
| EGFR(L858R)               | 30  | PRKCI                | 76  |
| EGFR(L858R,T790M)         | 3.8 | PRKCQ                | 59  |
| EGFR(L861Q)               | 44  | PRKD1                | 62  |
| EGFR(S752-I759del)        | 74  | PRKD2                | 43  |
| EGFR(T790M)               | 4.7 | PRKD3                | 26  |
| EIF2AK1                   | 83  | PRKG1                | 60  |
| EPHA1                     | 8   | PRKG2                | 95  |

|                    |      |                               |      |
|--------------------|------|-------------------------------|------|
| EPHA2              | 78   | PRKR                          | 70   |
| EPHA3              | 56   | PRKX                          | 95   |
| EPHA4              | 96   | PRP4                          | 83   |
| EPHA5              | 100  | PYK2                          | 0.85 |
| EPHA6              | 55   | QSK                           | 100  |
| EPHA7              | 64   | RAF1                          | 98   |
| EPHA8              | 71   | RET                           | 0.1  |
| EPHB1              | 30   | RET(M918T)                    | 0.6  |
| EPHB2              | 96   | RET(V804L)                    | 0.3  |
| EPHB3              | 93   | RET(V804M)                    | 0.5  |
| EPHB4              | 81   | RIOK1                         | 3.6  |
| EPHB6              | 1.2  | RIOK2                         | 65   |
| ERBB2              | 78   | RIOK3                         | 11   |
| ERBB3              | 56   | RIPK1                         | 92   |
| ERBB4              | 35   | RIPK2                         | 79   |
| ERK1               | 95   | RIPK4                         | 44   |
| ERK2               | 96   | RIPK5                         | 35   |
| ERK3               | 19   | ROCK1                         | 47   |
| ERK4               | 57   | ROCK2                         | 64   |
| ERK5               | 20   | ROS1                          | 3.2  |
| ERK8               | 26   | RPS6KA4(Kin.Dom.1-N-terminal) | 22   |
| ERN1               | 29   | RPS6KA4(Kin.Dom.2-C-terminal) | 80   |
| FAK                | 1.6  | RPS6KA5(Kin.Dom.1-N-terminal) | 98   |
| FER                | 5.7  | RPS6KA5(Kin.Dom.2-C-terminal) | 90   |
| FES                | 58   | RSK1(Kin.Dom.1-N-terminal)    | 3.5  |
| FGFR1              | 1.6  | RSK1(Kin.Dom.2-C-terminal)    | 97   |
| FGFR2              | 13   | RSK2(Kin.Dom.1-N-terminal)    | 0.1  |
| FGFR3              | 11   | RSK2(Kin.Dom.2-C-terminal)    | 100  |
| FGFR3(G697C)       | 11   | RSK3(Kin.Dom.1-N-terminal)    | 2.7  |
| FGFR4              | 51   | RSK3(Kin.Dom.2-C-terminal)    | 85   |
| FGR                | 7.3  | RSK4(Kin.Dom.1-N-terminal)    | 7.3  |
| FLT1               | 43   | RSK4(Kin.Dom.2-C-terminal)    | 100  |
| FLT3               | 4.7  | S6K1                          | 36   |
| FLT3(D835H)        | 6.7  | SBK1                          | 6    |
| FLT3(D835V)        | 1.6  | SGK                           | 31   |
| FLT3(D835Y)        | 0.65 | SgK110                        | 6.7  |
| FLT3(ITD)          | 4.2  | SGK2                          | 80   |
| FLT3(ITD,D835V)    | 2.1  | SGK3                          | 45   |
| FLT3(ITD,F691L)    | 0    | SIK                           | 0.8  |
| FLT3(K663Q)        | 1.5  | SIK2                          | 6.3  |
| FLT3(N841I)        | 0    | SLK                           | 0.25 |
| FLT3(R834Q)        | 12   | SNARK                         | 0.6  |
| FLT3-autoinhibited | 50   | SNRK                          | 80   |

|                              |      |                              |      |
|------------------------------|------|------------------------------|------|
| FLT4                         | 54   | SRC                          | 0.7  |
| FRK                          | 13   | SRMS                         | 17   |
| FYN                          | 12   | SRPK1                        | 11   |
| GAK                          | 9.8  | SRPK2                        | 100  |
| GCN2(Kin.Dom.2,S808G)        | 2.3  | SRPK3                        | 14   |
| GRK1                         | 61   | STK16                        | 2.6  |
| GRK2                         | 91   | STK33                        | 10   |
| GRK3                         | 67   | STK35                        | 33   |
| GRK4                         | 16   | STK36                        | 46   |
| GRK7                         | 78   | STK39                        | 83   |
| GSK3A                        | 100  | SYK                          | 27   |
| GSK3B                        | 92   | TAK1                         | 45   |
| HASPIN                       | 100  | TAOK1                        | 6.6  |
| HCK                          | 0.8  | TAOK2                        | 55   |
| HIPK1                        | 2.6  | TAOK3                        | 10   |
| HIPK2                        | 2.2  | TBK1                         | 28   |
| HIPK3                        | 11   | TEC                          | 0.95 |
| HIPK4                        | 1.6  | TESK1                        | 32   |
| HPK1                         | 0.25 | TGFBR1                       | 9.8  |
| HUNK                         | 100  | TGFBR2                       | 100  |
| ICK                          | 60   | TIE1                         | 1.1  |
| IGF1R                        | 3.8  | TIE2                         | 5.2  |
| IKK-alpha                    | 83   | TLK1                         | 88   |
| IKK-beta                     | 93   | TLK2                         | 100  |
| IKK-epsilon                  | 33   | TNIK                         | 38   |
| INSR                         | 7.4  | TNK1                         | 0    |
| INSRR                        | 8    | TNK2                         | 2.8  |
| IRAK1                        | 0    | TNNI3K                       | 81   |
| IRAK3                        | 6.2  | TRKA                         | 0    |
| IRAK4                        | 6.1  | TRKB                         | 0    |
| ITK                          | 0.35 | TRKC                         | 3.6  |
| JAK1(JH1domain-catalytic)    | 41   | TRPM6                        | 100  |
| JAK1(JH2domain-pseudokinase) | 0.3  | TSSK1B                       | 22   |
| JAK2(JH1domain-catalytic)    | 0    | TSSK3                        | 66   |
| JAK3(JH1domain-catalytic)    | 0    | TTK                          | 10   |
| JNK1                         | 2    | TXK                          | 8.7  |
| JNK2                         | 15   | TYK2(JH1domain-catalytic)    | 0    |
| JNK3                         | 1.7  | TYK2(JH2domain-pseudokinase) | 5    |
| KIT                          | 58   | TYRO3                        | 42   |
| KIT(A829P)                   | 38   | ULK1                         | 6.1  |
| KIT(D816H)                   | 26   | ULK2                         | 6.6  |
| KIT(D816V)                   | 13   | ULK3                         | 0.95 |
| KIT(L576P)                   | 41   | VEGFR2                       | 38   |
| KIT(V559D)                   | 53   | VPS34                        | 71   |
| KIT(V559D,T670I)             | 92   | VRK2                         | 74   |

|                   |      |       |      |
|-------------------|------|-------|------|
| KIT(V559D,V654A)  | 100  | WEE1  | 0.55 |
| KIT-autoinhibited | 60   | WEE2  | 0.2  |
| LATS1             | 52   | WNK1  | 99   |
| LATS2             | 39   | WNK2  | 100  |
| LCK               | 0.35 | WNK3  | 96   |
| LIMK1             | 36   | WNK4  | 100  |
| LIMK2             | 53   | YANK1 | 65   |
| LKB1              | 75   | YANK2 | 100  |
| LOK               | 0    | YANK3 | 100  |
| LRRK2             | 21   | YES   | 3.3  |
| LRRK2(G2019S)     | 45   | YSK1  | 100  |
| LTK               | 15   | YSK4  | 1.9  |
| LYN               | 28   | ZAK   | 73   |
| LZK               | 3.4  | ZAP70 | 69   |

**Table S4.** KINOMEScan kinase selectivity profiles for 7.

| <b>Kinases</b>                | <b>Scores</b> | <b>Kinases</b> | <b>Scores</b> |
|-------------------------------|---------------|----------------|---------------|
| AAK1                          | 3.8           | MAP3K1         | 60            |
| ABL1(E255K)-phosphorylated    | 0             | MAP3K15        | 28            |
| ABL1(F317I)-nonphosphorylated | 31            | MAP3K2         | 0             |
| ABL1(F317I)-phosphorylated    | 5.8           | MAP3K3         | 0.6           |
| ABL1(F317L)-nonphosphorylated | 12            | MAP3K4         | 1.4           |
| ABL1(F317L)-phosphorylated    | 0.3           | MAP4K2         | 1             |
| ABL1(H396P)-nonphosphorylated | 0             | MAP4K3         | 4             |
| ABL1(H396P)-phosphorylated    | 0             | MAP4K4         | 7.3           |
| ABL1(M351T)-phosphorylated    | 0.1           | MAP4K5         | 26            |
| ABL1(Q252H)-nonphosphorylated | 0             | MAPKAPK2       | 100           |
| ABL1(Q252H)-phosphorylated    | 0             | MAPKAPK5       | 75            |
| ABL1(T315I)-nonphosphorylated | 0             | MARK1          | 11            |
| ABL1(T315I)-phosphorylated    | 0.15          | MARK2          | 4.4           |
| ABL1(Y253F)-phosphorylated    | 0             | MARK3          | 5             |
| ABL1-nonphosphorylated        | 0.1           | MARK4          | 8.9           |
| ABL1-phosphorylated           | 0             | MAST1          | 38            |
| ABL2                          | 5.6           | MEK1           | 2             |
| ACVR1                         | 77            | MEK2           | 0.7           |
| ACVR1B                        | 94            | MEK3           | 5.5           |
| ACVR2A                        | 100           | MEK4           | 6.6           |
| ACVR2B                        | 92            | MEK5           | 0.1           |
| ACVRL1                        | 100           | MEK6           | 3.2           |
| ADCK3                         | 100           | MELK           | 18            |

|             |     |             |      |
|-------------|-----|-------------|------|
| ADCK4       | 6.2 | MERTK       | 0.35 |
| AKT1        | 100 | MET         | 12   |
| AKT2        | 99  | MET(M1250T) | 3.4  |
| AKT3        | 100 | MET(Y1235D) | 12   |
| ALK         | 4.2 | MINK        | 2.6  |
| ALK(C1156Y) | 3.3 | MKK7        | 92   |
| ALK(L1196M) | 4.1 | MKNK1       | 50   |
| AMPK-alpha1 | 6   | MKNK2       | 1.3  |
| AMPK-alpha2 | 5.4 | MLCK        | 18   |
| ANKK1       | 77  | MLK1        | 1.1  |
| ARK5        | 0.7 | MLK2        | 0.85 |
| ASK1        | 100 | MLK3        | 6.8  |
| ASK2        | 87  | MRCKA       | 82   |
| AURKA       | 0   | MRCKB       | 100  |
| AURKB       | 0.6 | MST1        | 20   |
| AURKC       | 1   | MST1R       | 85   |
| AXL         | 1.4 | MST2        | 5    |
| BIKE        | 0.6 | MST3        | 1.6  |
| BLK         | 1.1 | MST4        | 10   |
| BMPR1A      | 100 | MTOR        | 100  |
| BMPR1B      | 4.6 | MUSK        | 2.4  |
| BMPR2       | 83  | MYLK        | 35   |
| BMX         | 47  | MYLK2       | 33   |
| BRAF        | 56  | MYLK4       | 0.1  |
| BRAF(V600E) | 49  | MYO3A       | 40   |
| BRK         | 31  | MYO3B       | 100  |
| BRSK1       | 79  | NDR1        | 31   |
| BRSK2       | 77  | NDR2        | 40   |
| BTK         | 5.3 | NEK1        | 7    |
| BUB1        | 16  | NEK10       | 5.8  |
| CAMK1       | 45  | NEK11       | 11   |
| CAMK1D      | 5.9 | NEK2        | 2.8  |
| CAMK1G      | 28  | NEK3        | 0.75 |
| CAMK2A      | 32  | NEK4        | 6.6  |
| CAMK2B      | 55  | NEK5        | 11   |
| CAMK2D      | 49  | NEK6        | 2.9  |
| CAMK2G      | 51  | NEK7        | 1.5  |
| CAMK4       | 100 | NEK9        | 8.6  |
| CAMKK1      | 5.4 | NIK         | 22   |
| CAMKK2      | 6.8 | NIM1        | 3.2  |
| CASK        | 62  | NLK         | 70   |
| CDC2L1      | 79  | OSR1        | 22   |
| CDC2L2      | 72  | p38-alpha   | 93   |
| CDC2L5      | 26  | p38-beta    | 100  |
| CDK11       | 100 | p38-delta   | 100  |

|                     |      |                       |      |
|---------------------|------|-----------------------|------|
| CDK2                | 70   | p38-gamma             | 90   |
| CDK3                | 83   | PAK1                  | 4.8  |
| CDK4-cyclinD1       | 0    | PAK2                  | 2.1  |
| CDK4-cyclinD3       | 0.1  | PAK3                  | 16   |
| CDK5                | 78   | PAK4                  | 3.5  |
| CDK7                | 0.85 | PAK6                  | 1.9  |
| CDK8                | 94   | PAK7                  | 0.4  |
| CDK9                | 66   | PCTK1                 | 0    |
| CDKL1               | 28   | PCTK2                 | 1.3  |
| <b>CDKL2</b>        | 0.2  | PCTK3                 | 17   |
| CDKL3               | 1.6  | PDGFRA                | 1.6  |
| CDKL5               | 21   | <b>PDGFRB</b>         | 0    |
| CHEK1               | 8.4  | PDPK1                 | 100  |
| CHEK2               | 0.85 | PFCDPK1(P.falciparum) | 0.35 |
| CIT                 | 7    | PFPK5(P.falciparum)   | 95   |
| CLK1                | 1.4  | PFTAIRE2              | 45   |
| CLK2                | 2.4  | PFTK1                 | 40   |
| CLK3                | 68   | PHKG1                 | 3.6  |
| CLK4                | 1    | PHKG2                 | 13   |
| CSF1R               | 16   | PIK3C2B               | 94   |
| CSF1R-autoinhibited | 29   | PIK3C2G               | 99   |
| CSK                 | 64   | PIK3CA                | 93   |
| CSNK1A1             | 37   | PIK3CA(C420R)         | 100  |
| CSNK1A1L            | 98   | PIK3CA(E542K)         | 100  |
| CSNK1D              | 100  | PIK3CA(E545A)         | 94   |
| CSNK1E              | 98   | PIK3CA(E545K)         | 99   |
| CSNK1G1             | 40   | PIK3CA(H1047L)        | 98   |
| CSNK1G2             | 72   | PIK3CA(H1047Y)        | 97   |
| CSNK1G3             | 72   | PIK3CA(I800L)         | 74   |
| CSNK2A1             | 0.35 | PIK3CA(M1043I)        | 100  |
| CSNK2A2             | 0    | PIK3CA(Q546K)         | 87   |
| CTK                 | 53   | PIK3CB                | 97   |
| DAPK1               | 1    | PIK3CD                | 100  |
| DAPK2               | 15   | PIK3CG                | 86   |
| DAPK3               | 5    | PIK4CB                | 57   |
| DCAMKL1             | 4.8  | PIM1                  | 51   |
| DCAMKL2             | 2.4  | PIM2                  | 100  |
| DCAMKL3             | 6.4  | PIM3                  | 7.8  |
| DDR1                | 15   | PIP5K1A               | 7    |
| DDR2                | 8.7  | PIP5K1C               | 14   |
| DLK                 | 9.4  | PIP5K2B               | 15   |
| DMPK                | 37   | PIP5K2C               | 25   |
| DMPK2               | 80   | PKAC-alpha            | 56   |
| DRAK1               | 0.2  | PKAC-beta             | 55   |
| DRAK2               | 7    | PKMYT1                | 100  |



|                           |      |                               |      |
|---------------------------|------|-------------------------------|------|
| DYRK1A                    | 1.4  | PKN1                          | 24   |
| DYRK1B                    | 0    | PKN2                          | 43   |
| DYRK2                     | 0.2  | PKNB(M.tuberculosis)          | 0.15 |
| EGFR                      | 73   | PLK1                          | 0.45 |
| EGFR(E746-A750del)        | 40   | PLK2                          | 3    |
| EGFR(G719C)               | 67   | PLK3                          | 4.8  |
| EGFR(G719S)               | 79   | PLK4                          | 0.2  |
| EGFR(L747-E749del, A750P) | 22   | PRKCD                         | 23   |
| EGFR(L747-S752del, P753S) | 33   | PRKCE                         | 19   |
| EGFR(L747-T751del,Sins)   | 20   | PRKCH                         | 100  |
| EGFR(L858R)               | 36   | PRKCI                         | 81   |
| EGFR(L858R,T790M)         | 2.8  | PRKCQ                         | 37   |
| EGFR(L861Q)               | 37   | PRKD1                         | 10   |
| EGFR(S752-I759del)        | 56   | PRKD2                         | 0.25 |
| EGFR(T790M)               | 4.4  | PRKD3                         | 1.9  |
| EIF2AK1                   | 0.15 | PRKG1                         | 100  |
| EPHA1                     | 15   | PRKG2                         | 76   |
| EPHA2                     | 83   | PRKR                          | 4.8  |
| EPHA3                     | 22   | PRKX                          | 100  |
| EPHA4                     | 85   | PRP4                          | 18   |
| EPHA5                     | 96   | PYK2                          | 9.4  |
| EPHA6                     | 70   | QSK                           | 66   |
| EPHA7                     | 48   | RAF1                          | 93   |
| EPHA8                     | 96   | RET                           | 1.4  |
| EPHB1                     | 65   | RET(M918T)                    | 1.1  |
| EPHB2                     | 89   | RET(V804L)                    | 1    |
| EPHB3                     | 91   | RET(V804M)                    | 0.65 |
| EPHB4                     | 71   | RIOK1                         | 12   |
| EPHB6                     | 0.65 | RIOK2                         | 6.8  |
| ERBB2                     | 74   | RIOK3                         | 9    |
| ERBB3                     | 26   | RIPK1                         | 17   |
| ERBB4                     | 47   | RIPK2                         | 72   |
| ERK1                      | 100  | RIPK4                         | 47   |
| ERK2                      | 100  | RIPK5                         | 7.2  |
| ERK3                      | 0    | ROCK1                         | 4.6  |
| ERK4                      | 4.3  | ROCK2                         | 2.1  |
| ERK5                      | 52   | ROS1                          | 15   |
| ERK8                      | 0.5  | RPS6KA4(Kin.Dom.1-N-terminal) | 56   |
| ERN1                      | 8.4  | RPS6KA4(Kin.Dom.2-C-terminal) | 3.5  |
| FAK                       | 3    | RPS6KA5(Kin.Dom.1-N-terminal) | 79   |
| FER                       | 10   | RPS6KA5(Kin.Dom.2-C-terminal) | 30   |

|                       |      |                            |      |
|-----------------------|------|----------------------------|------|
| FES                   | 4.4  | RSK1(Kin.Dom.1-N-terminal) | 0.6  |
| FGFR1                 | 0.7  | RSK1(Kin.Dom.2-C-terminal) | 14   |
| FGFR2                 | 7.4  | RSK2(Kin.Dom.1-N-terminal) | 0.2  |
| FGFR3                 | 11   | RSK2(Kin.Dom.2-C-terminal) | 84   |
| FGFR3(G697C)          | 8.9  | RSK3(Kin.Dom.1-N-terminal) | 8    |
| FGFR4                 | 44   | RSK3(Kin.Dom.2-C-terminal) | 17   |
| FGR                   | 23   | RSK4(Kin.Dom.1-N-terminal) | 4.2  |
| FLT1                  | 0.6  | RSK4(Kin.Dom.2-C-terminal) | 20   |
| FLT3                  | 0.1  | S6K1                       | 3.2  |
| FLT3(D835H)           | 0.45 | SBK1                       | 6.4  |
| FLT3(D835Y)           | 0.25 | SGK                        | 9.2  |
| FLT3(ITD)             | 0.2  | SgK110                     | 53   |
| FLT3(K663Q)           | 0    | SGK2                       | 62   |
| FLT3(N841I)           | 0    | SGK3                       | 36   |
| FLT3(R834Q)           | 0.05 | SIK                        | 40   |
| FLT3-autoinhibited    | 0    | SIK2                       | 16   |
| FLT4                  | 0    | SLK                        | 0.65 |
| FRK                   | 14   | SNARK                      | 0.35 |
| FYN                   | 14   | SNRK                       | 50   |
| GAK                   | 1.8  | SRC                        | 1.6  |
| GCN2(Kin.Dom.2,S808G) | 0.05 | SRMS                       | 4.5  |
| GRK1                  | 51   | SRPK1                      | 3.2  |
| GRK4                  | 35   | SRPK2                      | 14   |
| GRK7                  | 52   | SRPK3                      | 25   |
| GSK3A                 | 100  | STK16                      | 1.4  |
| GSK3B                 | 78   | STK33                      | 2.3  |
| HASPIN                | 35   | STK35                      | 79   |
| HCK                   | 34   | STK36                      | 2.2  |
| HIPK1                 | 0.2  | STK39                      | 19   |
| HIPK2                 | 0.15 | SYK                        | 12   |
| HIPK3                 | 0.65 | <b>TAK1</b>                | 0.1  |
| HIPK4                 | 0.75 | TAOK1                      | 7.7  |
| HPK1                  | 0.75 | TAOK2                      | 7.2  |
| HUNK                  | 86   | TAOK3                      | 7.4  |
| ICK                   | 11   | TBK1                       | 1.8  |
| IGF1R                 | 1    | TEC                        | 69   |
| IKK-alpha             | 1.4  | TESK1                      | 95   |
| IKK-beta              | 2.6  | TGFBR1                     | 85   |
| IKK-epsilon           | 5.8  | TGFBR2                     | 100  |
| INSR                  | 0.25 | TIE1                       | 7.5  |
| INSRR                 | 0.35 | TIE2                       | 35   |
| IRAK1                 | 0    | TLK1                       | 3.5  |
| IRAK3                 | 3.4  | TLK2                       | 5    |
| IRAK4                 | 3.2  | TNIK                       | 0.65 |
| ITK                   | 2    | TNK1                       | 1.1  |

|                              |      |                              |      |
|------------------------------|------|------------------------------|------|
| JAK1(JH1domain-catalytic)    | 3.4  | TNK2                         | 20   |
| JAK1(JH2domain-pseudokinase) | 0    | TNNI3K                       | 59   |
| JAK2(JH1domain-catalytic)    | 0.1  | TRKA                         | 0.25 |
| JAK3(JH1domain-catalytic)    | 0.6  | TRKB                         | 0.15 |
| JNK1                         | 0    | TRKC                         | 3    |
| JNK2                         | 0    | TRPM6                        | 67   |
| JNK3                         | 0    | TSSK1B                       | 39   |
| KIT                          | 0.3  | TTK                          | 4.9  |
| KIT(A829P)                   | 0    | TXK                          | 21   |
| KIT(D816H)                   | 1.8  | TYK2(JH1domain-catalytic)    | 0.3  |
| KIT(D816V)                   | 0.5  | TYK2(JH2domain-pseudokinase) | 0.2  |
| KIT(L576P)                   | 1.6  | TYRO3                        | 94   |
| KIT(V559D)                   | 0.25 | ULK1                         | 0.1  |
| KIT(V559D,T670I)             | 1.7  | ULK2                         | 0.05 |
| KIT(V559D,V654A)             | 35   | ULK3                         | 0    |
| KIT-autoinhibited            | 28   | VEGFR2                       | 0.05 |
| LATS1                        | 49   | VRK2                         | 85   |
| LATS2                        | 7.4  | WEE1                         | 6    |
| LCK                          | 2    | WEE2                         | 4.1  |
| LIMK1                        | 97   | WNK1                         | 78   |
| LIMK2                        | 54   | WNK3                         | 89   |
| LKB1                         | 48   | YANK1                        | 34   |
| LOK                          | 3.7  | YANK2                        | 100  |
| LRRK2                        | 1.4  | YANK3                        | 100  |
| LRRK2(G2019S)                | 1.1  | YES                          | 12   |
| LTK                          | 15   | YSK1                         | 4.2  |
| LYN                          | 27   | YSK4                         | 0    |
| LZK                          | 4.2  | ZAK                          | 31   |
| MAK                          | 95   | ZAP70                        | 8.8  |

**Table S5.** KINOMEScan kinase selectivity profiles for **23**.

| <b>Kinases</b>                | <b>Scores</b> | <b>Kinases</b> | <b>Scores</b> |
|-------------------------------|---------------|----------------|---------------|
| AAK1                          | 46            | MAK            | 48            |
| ABL1(E255K)-phosphorylated    | 11            | MAP3K1         | 98            |
| ABL1(F317I)-nonphosphorylated | 94            | MAP3K15        | 99            |
| ABL1(F317I)-phosphorylated    | 100           | MAP3K2         | 9.9           |
| ABL1(F317L)-nonphosphorylated | 83            | MAP3K3         | 13            |
| ABL1(F317L)-phosphorylated    | 46            | MAP3K4         | 56            |
| ABL1(H396P)-nonphosphorylated | 37            | MAP4K2         | 48            |
| ABL1(H396P)-phosphorylated    | 28            | MAP4K3         | 73            |

|                               |      |             |      |
|-------------------------------|------|-------------|------|
| ABL1(M351T)-phosphorylated    | 21   | MAP4K4      | 62   |
| ABL1(Q252H)-nonphosphorylated | 22   | MAP4K5      | 72   |
| ABL1(Q252H)-phosphorylated    | 18   | MAPKAPK2    | 100  |
| ABL1(T315I)-nonphosphorylated | 26   | MAPKAPK5    | 94   |
| ABL1(T315I)-phosphorylated    | 1.9  | MARK1       | 36   |
| ABL1(Y253F)-phosphorylated    | 23   | MARK2       | 46   |
| ABL1-nonphosphorylated        | 41   | MARK3       | 33   |
| ABL1-phosphorylated           | 24   | MARK4       | 48   |
| ABL2                          | 55   | MAST1       | 51   |
| ACVR1                         | 100  | MEK1        | 19   |
| ACVR1B                        | 83   | MEK2        | 28   |
| ACVR2A                        | 100  | MEK3        | 4.1  |
| ACVR2B                        | 100  | MEK4        | 2.4  |
| ACVRL1                        | 100  | MEK5        | 0.3  |
| ADCK3                         | 100  | MEK6        | 11   |
| ADCK4                         | 9.4  | MELK        | 38   |
| AKT1                          | 100  | MERTK       | 2.8  |
| AKT2                          | 100  | MET         | 28   |
| AKT3                          | 100  | MET(M1250T) | 25   |
| ALK                           | 91   | MET(Y1235D) | 49   |
| ALK(C1156Y)                   | 65   | MINK        | 27   |
| ALK(L1196M)                   | 72   | MKK7        | 0.95 |
| AMPK-alpha1                   | 48   | MKNK1       | 100  |
| AMPK-alpha2                   | 18   | MKNK2       | 73   |
| ANKK1                         | 100  | MLCK        | 48   |
| ARK5                          | 16   | MLK1        | 5.9  |
| ASK1                          | 100  | MLK2        | 17   |
| ASK2                          | 100  | MLK3        | 23   |
| AURKA                         | 0.35 | MRCKA       | 100  |
| AURKB                         | 14   | MRCKB       | 100  |
| AURKC                         | 22   | MST1        | 86   |
| AXL                           | 6.2  | MST1R       | 87   |
| BIKE                          | 2.6  | MST2        | 8.2  |
| BLK                           | 50   | MST3        | 50   |
| BMPR1A                        | 75   | MST4        | 69   |
| BMPR1B                        | 73   | MTOR        | 100  |
| BMPR2                         | 46   | MUSK        | 85   |
| BMX                           | 80   | MYLK        | 74   |
| BRAF                          | 100  | MYLK2       | 65   |
| BRAF(V600E)                   | 100  | MYLK4       | 1    |
| BRK                           | 100  | MYO3A       | 87   |
| BRSK1                         | 89   | MYO3B       | 100  |
| BRSK2                         | 80   | NDR1        | 68   |
| BTK                           | 60   | NDR2        | 74   |
| BUB1                          | 100  | NEK1        | 47   |

|                     |      |                       |     |
|---------------------|------|-----------------------|-----|
| CAMK1               | 50   | NEK10                 | 100 |
| CAMK1B              | 100  | NEK11                 | 72  |
| CAMK1D              | 58   | NEK2                  | 53  |
| CAMK1G              | 100  | NEK3                  | 32  |
| CAMK2A              | 73   | NEK4                  | 81  |
| CAMK2B              | 83   | NEK5                  | 24  |
| CAMK2D              | 100  | NEK6                  | 50  |
| CAMK2G              | 92   | NEK7                  | 33  |
| CAMK4               | 100  | NEK9                  | 45  |
| CAMKK1              | 55   | NIK                   | 91  |
| CAMKK2              | 79   | NIM1                  | 67  |
| CASK                | 59   | NLK                   | 100 |
| CDC2L1              | 89   | OSR1                  | 65  |
| CDC2L2              | 72   | p38-alpha             | 93  |
| CDC2L5              | 96   | p38-beta              | 94  |
| CDK11               | 63   | p38-delta             | 72  |
| CDK2                | 22   | p38-gamma             | 42  |
| CDK3                | 61   | PAK1                  | 80  |
| CDK4                | 83   | PAK2                  | 63  |
| CDK4-cyclinD1       | 29   | PAK3                  | 90  |
| CDK4-cyclinD3       | 61   | PAK4                  | 37  |
| CDK5                | 21   | PAK6                  | 28  |
| CDK7                | 27   | PAK7                  | 73  |
| CDK8                | 100  | PCK1                  | 16  |
| CDK9                | 62   | PCK2                  | 16  |
| CDKL1               | 27   | PCK3                  | 39  |
| CDKL2               | 0.05 | PDGFRA                | 9.6 |
| CDKL3               | 2.1  | PDGFRB                | 0   |
| CDKL5               | 83   | PDPK1                 | 89  |
| CHEK1               | 0    | PFCDPK1(P.falciparum) | 29  |
| CHEK2               | 29   | PFPK5(P.falciparum)   | 100 |
| CIT                 | 78   | PFTAIRE2              | 46  |
| CLK1                | 30   | PFTK1                 | 37  |
| CLK2                | 12   | PHKG1                 | 92  |
| CLK3                | 83   | PHKG2                 | 79  |
| CLK4                | 3.9  | PIK3C2B               | 56  |
| CSF1R               | 36   | PIK3C2G               | 54  |
| CSF1R-autoinhibited | 91   | PIK3CA                | 60  |
| CSK                 | 82   | PIK3CA(C420R)         | 91  |
| CSNK1A1             | 63   | PIK3CA(E542K)         | 77  |
| CSNK1A1L            | 74   | PIK3CA(E545A)         | 84  |
| CSNK1D              | 92   | PIK3CA(E545K)         | 50  |
| CSNK1E              | 100  | PIK3CA(H1047L)        | 84  |
| CSNK1G1             | 90   | PIK3CA(H1047Y)        | 63  |
| CSNK1G2             | 98   | PIK3CA(I800L)         | 59  |
| CSNK1G3             | 100  | PIK3CA(M1043I)        | 93  |

|                           |      |                      |      |
|---------------------------|------|----------------------|------|
| CSNK2A1                   | 9.4  | PIK3CA(Q546K)        | 93   |
| CSNK2A2                   | 0.55 | PIK3CB               | 100  |
| CTK                       | 98   | PIK3CD               | 82   |
| DAPK1                     | 60   | PIK3CG               | 42   |
| DAPK2                     | 72   | PIK4CB               | 85   |
| DAPK3                     | 55   | PIKFYVE              | 98   |
| DCAMKL1                   | 85   | PIM1                 | 100  |
| DCAMKL2                   | 68   | PIM2                 | 100  |
| DCAMKL3                   | 22   | PIM3                 | 79   |
| DDR1                      | 60   | PIP5K1A              | 41   |
| DDR2                      | 100  | PIP5K1C              | 44   |
| DLK                       | 64   | PIP5K2B              | 57   |
| DMPK                      | 100  | PIP5K2C              | 11   |
| DMPK2                     | 100  | PKAC-alpha           | 100  |
| DRAK1                     | 24   | PKAC-beta            | 100  |
| DRAK2                     | 73   | PKMYT1               | 100  |
| DYRK1A                    | 15   | PKN1                 | 73   |
| DYRK1B                    | 3.5  | PKN2                 | 100  |
| DYRK2                     | 18   | PKNB(M.tuberculosis) | 0.75 |
| EGFR                      | 100  | PLK1                 | 66   |
| EGFR(E746-A750del)        | 50   | PLK2                 | 3.4  |
| EGFR(G719C)               | 66   | PLK3                 | 47   |
| EGFR(G719S)               | 80   | PLK4                 | 5.9  |
| EGFR(L747-E749del, A750P) | 100  | PRKCD                | 83   |
| EGFR(L747-S752del, P753S) | 70   | PRKCE                | 85   |
| EGFR(L747-T751del,Sins)   | 89   | PRKCH                | 58   |
| EGFR(L858R)               | 100  | PRKCI                | 55   |
| EGFR(L858R,T790M)         | 67   | PRKCQ                | 55   |
| EGFR(L861Q)               | 82   | PRKD1                | 100  |
| EGFR(S752-I759del)        | 83   | PRKD2                | 100  |
| EGFR(T790M)               | 48   | PRKD3                | 72   |
| EIF2AK1                   | 22   | PRKG1                | 100  |
| EPHA1                     | 53   | PRKG2                | 92   |
| EPHA2                     | 100  | PRKR                 | 47   |
| EPHA3                     | 99   | PRKX                 | 100  |
| EPHA4                     | 86   | PRP4                 | 56   |
| EPHA5                     | 79   | PYK2                 | 47   |
| EPHA6                     | 75   | QSK                  | 99   |
| EPHA7                     | 72   | RAF1                 | 90   |
| EPHA8                     | 97   | RET                  | 36   |
| EPHB1                     | 90   | RET(M918T)           | 16   |
| EPHB2                     | 100  | RET(V804L)           | 15   |
| EPHB3                     | 99   | RET(V804M)           | 20   |
| EPHB4                     | 76   | RIOK1                | 54   |
| EPHB6                     | 4    | RIOK2                | 24   |
| ERBB2                     | 89   | RIOK3                | 48   |

|                       |      |                               |     |
|-----------------------|------|-------------------------------|-----|
| ERBB3                 | 100  | RIPK1                         | 67  |
| ERBB4                 | 77   | RIPK2                         | 91  |
| ERK1                  | 85   | RIPK4                         | 24  |
| ERK2                  | 62   | RIPK5                         | 55  |
| ERK3                  | 0    | ROCK1                         | 76  |
| ERK4                  | 0    | ROCK2                         | 69  |
| ERK5                  | 94   | ROS1                          | 49  |
| ERK8                  | 4.8  | RPS6KA4(Kin.Dom.1-N-terminal) | 100 |
| ERN1                  | 63   | RPS6KA4(Kin.Dom.2-C-terminal) | 26  |
| FAK                   | 51   | RPS6KA5(Kin.Dom.1-N-terminal) | 54  |
| FER                   | 94   | RPS6KA5(Kin.Dom.2-C-terminal) | 43  |
| FES                   | 64   | RSK1(Kin.Dom.1-N-terminal)    | 11  |
| FGFR1                 | 29   | RSK1(Kin.Dom.2-C-terminal)    | 80  |
| FGFR2                 | 52   | RSK2(Kin.Dom.1-N-terminal)    | 7.8 |
| FGFR3                 | 51   | RSK2(Kin.Dom.2-C-terminal)    | 100 |
| FGFR3(G697C)          | 23   | RSK3(Kin.Dom.1-N-terminal)    | 27  |
| FGFR4                 | 95   | RSK3(Kin.Dom.2-C-terminal)    | 85  |
| FGR                   | 55   | RSK4(Kin.Dom.1-N-terminal)    | 23  |
| FLT1                  | 0.45 | RSK4(Kin.Dom.2-C-terminal)    | 82  |
| FLT3                  | 0.1  | S6K1                          | 36  |
| FLT3(D835H)           | 0    | SBK1                          | 61  |
| FLT3(D835V)           | 0.25 | SGK                           | 33  |
| FLT3(D835Y)           | 2.4  | SgK110                        | 86  |
| FLT3(ITD)             | 0.05 | SGK2                          | 69  |
| FLT3(ITD,D835V)       | 0    | SGK3                          | 65  |
| FLT3(ITD,F691L)       | 1.3  | SIK                           | 37  |
| FLT3(K663Q)           | 0.75 | SIK2                          | 58  |
| FLT3(N841I)           | 0.35 | SLK                           | 31  |
| FLT3(R834Q)           | 3    | SNARK                         | 6.8 |
| FLT3-autoinhibited    | 18   | SNRK                          | 93  |
| FLT4                  | 0.1  | SRC                           | 87  |
| FRK                   | 95   | SRMS                          | 56  |
| FYN                   | 93   | SRPK1                         | 4.8 |
| GAK                   | 7    | SRPK2                         | 83  |
| GCN2(Kin.Dom.2,S808G) | 1.7  | SRPK3                         | 56  |
| GRK1                  | 100  | STK16                         | 1   |
| GRK2                  | 100  | STK33                         | 58  |
| GRK3                  | 100  | STK35                         | 100 |
| GRK4                  | 47   | STK36                         | 57  |
| GRK7                  | 32   | STK39                         | 98  |
| GSK3A                 | 0.95 | SYK                           | 57  |
| GSK3B                 | 61   | <b>TAK1</b>                   | 5.5 |
| HASPIN                | 8.5  | TAOK1                         | 22  |

|                              |      |                              |     |
|------------------------------|------|------------------------------|-----|
| HCK                          | 100  | TAOK2                        | 65  |
| HIPK1                        | 7.9  | TAOK3                        | 66  |
| HIPK2                        | 3.1  | TBK1                         | 29  |
| HIPK3                        | 7.4  | TEC                          | 91  |
| HIPK4                        | 13   | TESK1                        | 87  |
| HPK1                         | 42   | TGFBR1                       | 68  |
| HUNK                         | 100  | TGFBR2                       | 100 |
| ICK                          | 18   | TIE1                         | 92  |
| IGF1R                        | 28   | TIE2                         | 55  |
| IKK-alpha                    | 72   | TLK1                         | 64  |
| IKK-beta                     | 43   | TLK2                         | 42  |
| IKK-epsilon                  | 46   | TNIK                         | 39  |
| INSR                         | 8    | TNK1                         | 100 |
| INSRR                        | 49   | TNK2                         | 88  |
| IRAK1                        | 6.6  | TNNI3K                       | 100 |
| IRAK3                        | 8.6  | TRKA                         | 3.5 |
| IRAK4                        | 81   | TRKB                         | 2   |
| ITK                          | 19   | TRKC                         | 26  |
| JAK1(JH1domain-catalytic)    | 39   | TRPM6                        | 100 |
| JAK1(JH2domain-pseudokinase) | 1.2  | TSSK1B                       | 100 |
| JAK2(JH1domain-catalytic)    | 1.3  | TSSK3                        | 92  |
| JAK3(JH1domain-catalytic)    | 0    | TTK                          | 9.9 |
| JNK1                         | 5.8  | TXK                          | 51  |
| JNK2                         | 3.1  | TYK2(JH1domain-catalytic)    | 14  |
| JNK3                         | 6    | TYK2(JH2domain-pseudokinase) | 20  |
| KIT                          | 0.1  | TYRO3                        | 71  |
| KIT(A829P)                   | 0.85 | ULK1                         | 34  |
| KIT(D816H)                   | 8.5  | ULK2                         | 53  |
| KIT(D816V)                   | 7.5  | ULK3                         | 6.1 |
| KIT(L576P)                   | 4.3  | VEGFR2                       | 0.1 |
| KIT(V559D)                   | 0.05 | VPS34                        | 37  |
| KIT(V559D,T670I)             | 0.9  | VRK2                         | 94  |
| KIT(V559D,V654A)             | 56   | WEE1                         | 95  |
| KIT-autoinhibited            | 99   | WEE2                         | 53  |
| LATS1                        | 100  | WNK1                         | 89  |
| LATS2                        | 58   | WNK2                         | 100 |
| LCK                          | 97   | WNK3                         | 81  |
| LIMK1                        | 99   | WNK4                         | 90  |
| LIMK2                        | 96   | YANK1                        | 86  |
| LKB1                         | 87   | YANK2                        | 71  |
| LOK                          | 84   | YANK3                        | 83  |
| LRRK2                        | 31   | YES                          | 82  |
| LRRK2(G2019S)                | 42   | YSK1                         | 43  |
| LTK                          | 97   | YSK4                         | 0.7 |
| LYN                          | 100  | ZAK                          | 51  |



**Table S6.** KINOMEScan kinase selectivity profiles for **25**.

| <b>Kinases</b>                | <b>Scores</b> | <b>Kinases</b> | <b>Scores</b> |
|-------------------------------|---------------|----------------|---------------|
| AAK1                          | 41            | MAK            | 84            |
| ABL1(E255K)-phosphorylated    | 49            | MAP3K1         | 100           |
| ABL1(F317I)-nonphosphorylated | 90            | MAP3K15        | 100           |
| ABL1(F317I)-phosphorylated    | 100           | MAP3K2         | 36            |
| ABL1(F317L)-nonphosphorylated | 87            | MAP3K3         | 25            |
| ABL1(F317L)-phosphorylated    | 65            | MAP3K4         | 78            |
| ABL1(H396P)-nonphosphorylated | 23            | MAP4K2         | 99            |
| ABL1(H396P)-phosphorylated    | 66            | MAP4K3         | 82            |
| ABL1(M351T)-phosphorylated    | 57            | MAP4K4         | 100           |
| ABL1(Q252H)-nonphosphorylated | 60            | MAP4K5         | 100           |
| ABL1(Q252H)-phosphorylated    | 51            | MAPKAPK2       | 100           |
| ABL1(T315I)-nonphosphorylated | 25            | MAPKAPK5       | 97            |
| ABL1(T315I)-phosphorylated    | 6.9           | MARK1          | 83            |
| ABL1(Y253F)-phosphorylated    | 67            | MARK2          | 98            |
| ABL1-nonphosphorylated        | 52            | MARK3          | 86            |
| ABL1-phosphorylated           | 54            | MARK4          | 81            |
| ABL2                          | 99            | MAST1          | 85            |
| ACVR1                         | 100           | MEK1           | 71            |
| ACVR1B                        | 89            | MEK2           | 79            |
| ACVR2A                        | 96            | MEK3           | 21            |
| ACVR2B                        | 100           | MEK4           | 1.6           |
| ACVRL1                        | 75            | MEK5           | 1.5           |
| ADCK3                         | 100           | MEK6           | 41            |
| ADCK4                         | 93            | MELK           | 100           |
| AKT1                          | 100           | MERTK          | 63            |
| AKT2                          | 89            | MET            | 66            |
| AKT3                          | 100           | MET(M1250T)    | 66            |
| ALK                           | 100           | MET(Y1235D)    | 67            |
| ALK(C1156Y)                   | 64            | MINK           | 86            |
| ALK(L1196M)                   | 90            | MKK7           | 100           |
| AMPK-alpha1                   | 97            | MKNK1          | 100           |
| AMPK-alpha2                   | 86            | MKNK2          | 91            |
| ANKK1                         | 100           | MLCK           | 93            |
| ARK5                          | 88            | MLK1           | 47            |
| ASK1                          | 99            | MLK2           | 60            |
| ASK2                          | 100           | MLK3           | 39            |
| AURKA                         | 0.1           | MRCKA          | 96            |
| AURKB                         | 9.8           | MRCKB          | 93            |
| AURKC                         | 33            | MST1           | 87            |
| AXL                           | 70            | MST1R          | 92            |
| BIKE                          | 32            | MST2           | 21            |

|               |     |                       |     |
|---------------|-----|-----------------------|-----|
| BLK           | 79  | MST3                  | 96  |
| BMPR1A        | 100 | MST4                  | 100 |
| BMPR1B        | 100 | MTOR                  | 100 |
| BMPR2         | 95  | MUSK                  | 84  |
| BMX           | 74  | MYLK                  | 75  |
| BRAF          | 100 | MYLK2                 | 94  |
| BRAF(V600E)   | 100 | MYLK4                 | 77  |
| BRK           | 96  | MYO3A                 | 89  |
| BRSK1         | 83  | MYO3B                 | 94  |
| BRSK2         | 85  | NDR1                  | 92  |
| BTK           | 60  | NDR2                  | 97  |
| BUB1          | 100 | NEK1                  | 100 |
| CAMK1         | 83  | NEK10                 | 100 |
| CAMK1B        | 100 | NEK11                 | 100 |
| CAMK1D        | 85  | NEK2                  | 81  |
| CAMK1G        | 94  | NEK3                  | 56  |
| CAMK2A        | 96  | NEK4                  | 83  |
| CAMK2B        | 100 | NEK5                  | 95  |
| CAMK2D        | 94  | NEK6                  | 99  |
| CAMK2G        | 95  | NEK7                  | 85  |
| CAMK4         | 90  | NEK9                  | 98  |
| CAMKK1        | 82  | NIK                   | 71  |
| CAMKK2        | 82  | NIM1                  | 100 |
| CASK          | 100 | NLK                   | 66  |
| CDC2L1        | 100 | OSR1                  | 100 |
| CDC2L2        | 99  | p38-alpha             | 100 |
| CDC2L5        | 100 | p38-beta              | 88  |
| CDK11         | 87  | p38-delta             | 84  |
| CDK2          | 95  | p38-gamma             | 100 |
| CDK3          | 95  | PAK1                  | 100 |
| CDK4          | 100 | PAK2                  | 93  |
| CDK4-cyclinD1 | 100 | PAK3                  | 92  |
| CDK4-cyclinD3 | 100 | PAK4                  | 64  |
| CDK5          | 91  | PAK6                  | 84  |
| CDK7          | 83  | PAK7                  | 100 |
| CDK8          | 100 | PCTK1                 | 100 |
| CDK9          | 97  | PCTK2                 | 92  |
| CDKL1         | 67  | PCTK3                 | 81  |
| CDKL2         | 35  | PDGFRA                | 24  |
| CDKL3         | 44  | PDGFRB                | 11  |
| CDKL5         | 100 | PDPK1                 | 93  |
| CHEK1         | 94  | PFCDPK1(P.falciparum) | 84  |
| CHEK2         | 78  | PFPK5(P.falciparum)   | 100 |
| CIT           | 84  | PFTAIRE2              | 94  |
| CLK1          | 80  | PFTK1                 | 76  |
| CLK2          | 85  | PHKG1                 | 81  |

|                           |     |                      |     |
|---------------------------|-----|----------------------|-----|
| CLK3                      | 81  | PHKG2                | 93  |
| CLK4                      | 92  | PIK3C2B              | 96  |
| CSF1R                     | 82  | PIK3C2G              | 99  |
| CSF1R-autoinhibited       | 96  | PIK3CA               | 100 |
| CSK                       | 91  | PIK3CA(C420R)        | 85  |
| CSNK1A1                   | 59  | PIK3CA(E542K)        | 87  |
| CSNK1A1L                  | 99  | PIK3CA(E545A)        | 93  |
| CSNK1D                    | 96  | PIK3CA(E545K)        | 88  |
| CSNK1E                    | 91  | PIK3CA(H1047L)       | 100 |
| CSNK1G1                   | 84  | PIK3CA(H1047Y)       | 100 |
| CSNK1G2                   | 100 | PIK3CA(I800L)        | 59  |
| CSNK1G3                   | 86  | PIK3CA(M1043I)       | 100 |
| CSNK2A1                   | 18  | PIK3CA(Q546K)        | 100 |
| CSNK2A2                   | 4.3 | PIK3CB               | 81  |
| CTK                       | 100 | PIK3CD               | 100 |
| DAPK1                     | 94  | PIK3CG               | 84  |
| DAPK2                     | 91  | PIK4CB               | 100 |
| DAPK3                     | 100 | PIKFYVE              | 94  |
| DCAMKL1                   | 82  | PIM1                 | 97  |
| DCAMKL2                   | 98  | PIM2                 | 100 |
| DCAMKL3                   | 67  | PIM3                 | 94  |
| DDR1                      | 77  | PIP5K1A              | 65  |
| DDR2                      | 100 | PIP5K1C              | 100 |
| DLK                       | 73  | PIP5K2B              | 100 |
| DMPK                      | 100 | PIP5K2C              | 40  |
| DMPK2                     | 94  | PKAC-alpha           | 100 |
| DRAK1                     | 88  | PKAC-beta            | 100 |
| DRAK2                     | 85  | PKMYT1               | 82  |
| DYRK1A                    | 100 | PKN1                 | 78  |
| DYRK1B                    | 73  | PKN2                 | 100 |
| DYRK2                     | 100 | PKNB(M.tuberculosis) | 6.1 |
| EGFR                      | 76  | PLK1                 | 100 |
| EGFR(E746-A750del)        | 94  | PLK2                 | 91  |
| EGFR(G719C)               | 95  | PLK3                 | 82  |
| EGFR(G719S)               | 94  | PLK4                 | 4.5 |
| EGFR(L747-E749del, A750P) | 67  | PRKCD                | 70  |
| EGFR(L747-S752del, P753S) | 88  | PRKCE                | 100 |
| EGFR(L747-T751del,Sins)   | 82  | PRKCH                | 95  |
| EGFR(L858R)               | 88  | PRKCI                | 87  |
| EGFR(L858R,T790M)         | 95  | PRKCQ                | 96  |
| EGFR(L861Q)               | 88  | PRKD1                | 79  |
| EGFR(S752-I759del)        | 91  | PRKD2                | 92  |
| EGFR(T790M)               | 59  | PRKD3                | 100 |
| EIF2AK1                   | 100 | PRKG1                | 100 |
| EPHA1                     | 72  | PRKG2                | 88  |
| EPHA2                     | 90  | PRKR                 | 68  |

|                    |      |                               |     |
|--------------------|------|-------------------------------|-----|
| EPHA3              | 100  | PRKX                          | 93  |
| EPHA4              | 91   | PRP4                          | 100 |
| EPHA5              | 93   | PYK2                          | 75  |
| EPHA6              | 90   | QSK                           | 100 |
| EPHA7              | 100  | RAF1                          | 86  |
| EPHA8              | 100  | RET                           | 81  |
| EPHB1              | 99   | RET(M918T)                    | 69  |
| EPHB2              | 76   | RET(V804L)                    | 69  |
| EPHB3              | 93   | RET(V804M)                    | 54  |
| EPHB4              | 94   | RIOK1                         | 71  |
| EPHB6              | 6.3  | RIOK2                         | 92  |
| ERBB2              | 95   | RIOK3                         | 77  |
| ERBB3              | 100  | RIPK1                         | 100 |
| ERBB4              | 92   | RIPK2                         | 99  |
| ERK1               | 84   | RIPK4                         | 100 |
| ERK2               | 77   | RIPK5                         | 100 |
| ERK3               | 43   | ROCK1                         | 100 |
| ERK4               | 72   | ROCK2                         | 95  |
| ERK5               | 100  | ROS1                          | 41  |
| ERK8               | 68   | RPS6KA4(Kin.Dom.1-N-terminal) | 100 |
| ERN1               | 100  | RPS6KA4(Kin.Dom.2-C-terminal) | 100 |
| FAK                | 82   | RPS6KA5(Kin.Dom.1-N-terminal) | 93  |
| FER                | 75   | RPS6KA5(Kin.Dom.2-C-terminal) | 100 |
| FES                | 86   | RSK1(Kin.Dom.1-N-terminal)    | 100 |
| FGFR1              | 22   | RSK1(Kin.Dom.2-C-terminal)    | 94  |
| FGFR2              | 23   | RSK2(Kin.Dom.1-N-terminal)    | 53  |
| FGFR3              | 31   | RSK2(Kin.Dom.2-C-terminal)    | 100 |
| FGFR3(G697C)       | 27   | RSK3(Kin.Dom.1-N-terminal)    | 69  |
| FGFR4              | 73   | RSK3(Kin.Dom.2-C-terminal)    | 91  |
| FGR                | 81   | RSK4(Kin.Dom.1-N-terminal)    | 79  |
| FLT1               | 10   | RSK4(Kin.Dom.2-C-terminal)    | 100 |
| FLT3               | 3.3  | S6K1                          | 67  |
| FLT3(D835H)        | 28   | SBK1                          | 95  |
| FLT3(D835V)        | 0.6  | SGK                           | 100 |
| FLT3(D835Y)        | 7.4  | SgK110                        | 83  |
| FLT3(ITD)          | 3.5  | SGK2                          | 100 |
| FLT3(ITD,D835V)    | 0.55 | SGK3                          | 100 |
| FLT3(ITD,F691L)    | 1.4  | SIK                           | 93  |
| FLT3(K663Q)        | 12   | SIK2                          | 80  |
| FLT3(N841I)        | 0    | SLK                           | 14  |
| FLT3(R834Q)        | 13   | SNARK                         | 28  |
| FLT3-autoinhibited | 19   | SNRK                          | 100 |
| FLT4               | 2.1  | SRC                           | 76  |

|                              |     |                              |     |
|------------------------------|-----|------------------------------|-----|
| FRK                          | 100 | SRMS                         | 76  |
| FYN                          | 83  | SRPK1                        | 66  |
| GAK                          | 20  | SRPK2                        | 76  |
| GCN2(Kin.Dom.2,S808G)        | 24  | SRPK3                        | 93  |
| GRK1                         | 94  | STK16                        | 6   |
| GRK2                         | 100 | STK33                        | 95  |
| GRK3                         | 100 | STK35                        | 91  |
| GRK4                         | 100 | STK36                        | 87  |
| GRK7                         | 96  | STK39                        | 61  |
| GSK3A                        | 47  | SYK                          | 45  |
| GSK3B                        | 92  | <b>TAK1</b>                  | 12  |
| HASPIN                       | 84  | TAOK1                        | 100 |
| HCK                          | 79  | TAOK2                        | 100 |
| HIPK1                        | 23  | TAOK3                        | 100 |
| HIPK2                        | 41  | TBK1                         | 27  |
| HIPK3                        | 56  | TEC                          | 85  |
| HIPK4                        | 78  | TESK1                        | 90  |
| HPK1                         | 82  | TGFBR1                       | 98  |
| HUNK                         | 100 | TGFBR2                       | 86  |
| ICK                          | 100 | TIE1                         | 66  |
| IGF1R                        | 70  | TIE2                         | 57  |
| IKK-alpha                    | 100 | TLK1                         | 98  |
| IKK-beta                     | 100 | TLK2                         | 100 |
| IKK-epsilon                  | 69  | TNIK                         | 81  |
| INSR                         | 12  | TNK1                         | 71  |
| INSRR                        | 75  | TNK2                         | 100 |
| IRAK1                        | 46  | TNNI3K                       | 97  |
| IRAK3                        | 37  | TRKA                         | 1.4 |
| IRAK4                        | 100 | TRKB                         | 8   |
| ITK                          | 60  | TRKC                         | 41  |
| JAK1(JH1domain-catalytic)    | 69  | TRPM6                        | 99  |
| JAK1(JH2domain-pseudokinase) | 3.1 | TSSK1B                       | 100 |
| JAK2(JH1domain-catalytic)    | 4.5 | TSSK3                        | 100 |
| JAK3(JH1domain-catalytic)    | 0   | TTK                          | 72  |
| JNK1                         | 39  | TXK                          | 73  |
| JNK2                         | 59  | TYK2(JH1domain-catalytic)    | 24  |
| JNK3                         | 63  | TYK2(JH2domain-pseudokinase) | 87  |
| KIT                          | 18  | TYRO3                        | 70  |
| KIT(A829P)                   | 100 | ULK1                         | 93  |
| KIT(D816H)                   | 100 | ULK2                         | 96  |
| KIT(D816V)                   | 22  | ULK3                         | 28  |
| KIT(L576P)                   | 36  | VEGFR2                       | 6.9 |
| KIT(V559D)                   | 22  | VPS34                        | 96  |
| KIT(V559D,T670I)             | 63  | VRK2                         | 100 |
| KIT(V559D,V654A)             | 78  | WEE1                         | 100 |
| KIT-autoinhibited            | 69  | WEE2                         | 77  |

|               |     |       |     |
|---------------|-----|-------|-----|
| LATS1         | 100 | WNK1  | 100 |
| LATS2         | 74  | WNK2  | 100 |
| LCK           | 83  | WNK3  | 100 |
| LIMK1         | 99  | WNK4  | 100 |
| LIMK2         | 100 | YANK1 | 100 |
| LKB1          | 100 | YANK2 | 100 |
| LOK           | 57  | YANK3 | 94  |
| LRRK2         | 21  | YES   | 99  |
| LRRK2(G2019S) | 79  | YSK1  | 100 |
| LTK           | 72  | YSK4  | 0.6 |
| LYN           | 87  | ZAK   | 81  |
| LZK           | 93  | ZAP70 | 100 |

**Table S7.** KINOMEscan kinase selectivity profiles for 5Z7.

| Kinases                       | Scores    |            |
|-------------------------------|-----------|------------|
|                               | 1 $\mu$ M | 10 $\mu$ M |
| AAK1                          | 61        | 13         |
| ABL1(E255K)-phosphorylated    | 81        | 85         |
| ABL1(F317I)-nonphosphorylated | 97        | 93         |
| ABL1(F317I)-phosphorylated    | 100       | 96         |
| ABL1(F317L)-nonphosphorylated | 100       | 95         |
| ABL1(F317L)-phosphorylated    | 100       | 100        |
| ABL1(H396P)-nonphosphorylated | 96        | 97         |
| ABL1(H396P)-phosphorylated    | 95        | 93         |
| ABL1(M351T)-phosphorylated    | 84        | 100        |
| ABL1(Q252H)-nonphosphorylated | 98        | 88         |
| ABL1(Q252H)-phosphorylated    | 100       | 95         |
| ABL1(T315I)-nonphosphorylated | 100       | 91         |
| ABL1(T315I)-phosphorylated    | 80        | 92         |
| ABL1(Y253F)-phosphorylated    | 100       | 90         |
| ABL1-nonphosphorylated        | 78        | 72         |
| ABL1-phosphorylated           | 81        | 82         |
| ABL2                          | 87        | 100        |
| ACVR1                         | 21        | 1.9        |
| ACVR1B                        | 100       | 69         |
| ACVR2A                        | 89        | 18         |
| ACVR2B                        | 81        | 46         |
| ACVRL1                        | 46        | 24         |
| ADCK3                         | 97        | 97         |
| ADCK4                         | 87        | 54         |
| AKT1                          | 96        | 95         |
| AKT2                          | 98        | 93         |
| AKT3                          | 100       | 95         |
| ALK                           | 100       | 73         |
| ALK(C1156Y)                   | 100       | 97         |

|               |     |     |
|---------------|-----|-----|
| ALK(L1196M)   | 100 | 100 |
| AMPK-alpha1   | 96  | 100 |
| AMPK-alpha2   | 92  | 90  |
| ANKK1         | 61  | 66  |
| ARK5          | 100 | 100 |
| ASK1          | 93  | 96  |
| ASK2          | 100 | 100 |
| AURKA         | 100 | 100 |
| AURKB         | 100 | 100 |
| AURKC         | 97  | 99  |
| AXL           | 100 | 85  |
| BIKE          | 68  | 3.8 |
| BLK           | 76  | 57  |
| BMPR1A        | 84  | 19  |
| BMPR1B        | 88  | 76  |
| BMPR2         | 100 | 90  |
| BMX           | 94  | 90  |
| BRAF          | 100 | 100 |
| BRAF(V600E)   | 100 | 100 |
| BRK           | 100 | 78  |
| BRSK1         | 100 | 80  |
| BRSK2         | 74  | 83  |
| BTK           | 86  | 99  |
| BUB1          | 100 | 98  |
| CAMK1         | 98  | 100 |
| CAMK1D        | 100 | 100 |
| CAMK1G        | 100 | 100 |
| CAMK2A        | 97  | 72  |
| CAMK2B        | 95  | 66  |
| CAMK2D        | 100 | 97  |
| CAMK2G        | 94  | 100 |
| CAMK4         | 100 | 100 |
| CAMKK1        | 100 | 92  |
| CAMKK2        | 92  | 88  |
| CASK          | 79  | 76  |
| CDC2L1        | 94  | 100 |
| CDC2L2        | 90  | 77  |
| CDC2L5        | 92  | 98  |
| CDK11         | 92  | 94  |
| CDK2          | 86  | 83  |
| CDK3          | 94  | 94  |
| CDK4-cyclinD1 | 91  | 95  |
| CDK4-cyclinD3 | 100 | 100 |
| CDK5          | 100 | 96  |
| CDK7          | 100 | 100 |
| CDK8          | 84  | 77  |

|                           |     |     |
|---------------------------|-----|-----|
| CDK9                      | 93  | 79  |
| CDKL1                     | 88  | 82  |
| CDKL2                     | 76  | 8.6 |
| CDKL3                     | 85  | 24  |
| CDKL5                     | 100 | 100 |
| CHEK1                     | 100 | 100 |
| CHEK2                     | 86  | 81  |
| CIT                       | 88  | 87  |
| CLK1                      | 96  | 93  |
| CLK2                      | 98  | 67  |
| CLK3                      | 87  | 93  |
| CLK4                      | 100 | 100 |
| CSF1R                     | 82  | 62  |
| CSF1R-autoinhibited       | 64  | 81  |
| CSK                       | 100 | 87  |
| CSNK1A1                   | 100 | 98  |
| CSNK1A1L                  | 100 | 88  |
| CSNK1D                    | 93  | 70  |
| CSNK1E                    | 92  | 99  |
| CSNK1G1                   | 100 | 100 |
| CSNK1G2                   | 89  | 62  |
| CSNK1G3                   | 97  | 94  |
| CSNK2A1                   | 67  | 55  |
| CSNK2A2                   | 82  | 60  |
| CTK                       | 100 | 100 |
| DAPK1                     | 94  | 74  |
| DAPK2                     | 94  | 86  |
| DAPK3                     | 93  | 79  |
| DCAMKL1                   | 80  | 74  |
| DCAMKL2                   | 100 | 100 |
| DCAMKL3                   | 100 | 100 |
| DDR1                      | 100 | 100 |
| DDR2                      | 93  | 100 |
| DLK                       | 94  | 96  |
| DMPK                      | 100 | 100 |
| DMPK2                     | 91  | 91  |
| DRAK1                     | 100 | 100 |
| DRAK2                     | 100 | 100 |
| DYRK1A                    | 100 | 100 |
| DYRK1B                    | 69  | 86  |
| DYRK2                     | 100 | 95  |
| EGFR                      | 100 | 99  |
| EGFR(E746-A750del)        | 100 | 91  |
| EGFR(G719C)               | 75  | 76  |
| EGFR(G719S)               | 90  | 93  |
| EGFR(L747-E749del, A750P) | 79  | 79  |



|                           |     |      |
|---------------------------|-----|------|
| EGFR(L747-S752del, P753S) | 84  | 71   |
| EGFR(L747-T751del,Sins)   | 92  | 89   |
| EGFR(L858R)               | 93  | 80   |
| EGFR(L858R,T790M)         | 100 | 100  |
| EGFR(L861Q)               | 100 | 100  |
| EGFR(S752-I759del)        | 96  | 100  |
| EGFR(T790M)               | 100 | 100  |
| EIF2AK1                   | 100 | 100  |
| EPHA1                     | 80  | 62   |
| EPHA2                     | 88  | 74   |
| EPHA3                     | 79  | 68   |
| EPHA4                     | 94  | 85   |
| EPHA5                     | 92  | 91   |
| EPHA6                     | 99  | 76   |
| EPHA7                     | 83  | 92   |
| EPHA8                     | 84  | 96   |
| EPHB1                     | 98  | 98   |
| EPHB2                     | 100 | 87   |
| EPHB3                     | 93  | 100  |
| EPHB4                     | 94  | 85   |
| EPHB6                     | 71  | 12   |
| ERBB2                     | 100 | 100  |
| ERBB3                     | 100 | 100  |
| ERBB4                     | 87  | 81   |
| ERK1                      | 97  | 58   |
| ERK2                      | 92  | 64   |
| ERK3                      | 96  | 98   |
| ERK4                      | 100 | 100  |
| ERK5                      | 100 | 100  |
| ERK8                      | 75  | 13   |
| ERN1                      | 93  | 77   |
| FAK                       | 100 | 100  |
| FER                       | 88  | 93   |
| FES                       | 90  | 88   |
| FGFR1                     | 96  | 100  |
| FGFR2                     | 94  | 82   |
| FGFR3                     | 100 | 95   |
| FGFR3(G697C)              | 96  | 83   |
| FGFR4                     | 80  | 93   |
| FGR                       | 89  | 84   |
| FLT1                      | 16  | 0.5  |
| FLT3                      | 4.2 | 0.55 |
| FLT3(D835H)               | 13  | 11   |
| FLT3(D835Y)               | 8   | 16   |
| FLT3(ITD)                 | 4.2 | 0.25 |
| FLT3(K663Q)               | 8.6 | 6.4  |

|                              |     |      |
|------------------------------|-----|------|
| FLT3(N841I)                  | 2.6 | 0.85 |
| FLT3(R834Q)                  | 77  | 23   |
| FLT3-autoinhibited           | 100 | 100  |
| FLT4                         | 8.2 | 0.3  |
| FRK                          | 100 | 97   |
| FYN                          | 100 | 99   |
| GAK                          | 10  | 10   |
| GCN2(Kin.Dom.2,S808G)        | 100 | 100  |
| GRK1                         | 96  | 87   |
| GRK4                         | 95  | 42   |
| GRK7                         | 100 | 100  |
| GSK3A                        | 100 | 100  |
| GSK3B                        | 99  | 100  |
| HASPIN                       | 100 | 94   |
| HCK                          | 58  | 45   |
| HIPK1                        | 70  | 71   |
| HIPK2                        | 100 | 100  |
| HIPK3                        | 100 | 100  |
| HIPK4                        | 93  | 82   |
| HPK1                         | 94  | 76   |
| HUNK                         | 82  | 69   |
| ICK                          | 100 | 100  |
| IGF1R                        | 87  | 80   |
| IKK-alpha                    | 100 | 100  |
| IKK-beta                     | 75  | 79   |
| IKK-epsilon                  | 100 | 95   |
| INSR                         | 77  | 71   |
| INSRR                        | 82  | 71   |
| IRAK1                        | 100 | 84   |
| IRAK3                        | 90  | 63   |
| IRAK4                        | 74  | 70   |
| ITK                          | 82  | 100  |
| JAK1(JH1domain-catalytic)    | 89  | 100  |
| JAK1(JH2domain-pseudokinase) | 96  | 99   |
| JAK2(JH1domain-catalytic)    | 100 | 95   |
| JAK3(JH1domain-catalytic)    | 100 | 77   |
| JNK1                         | 87  | 92   |
| JNK2                         | 95  | 100  |
| JNK3                         | 93  | 95   |
| KIT                          | 20  | 0.6  |
| KIT(A829P)                   | 43  | 10   |
| KIT(D816H)                   | 43  | 7.6  |
| KIT(D816V)                   | 1   | 0.4  |
| KIT(L576P)                   | 17  | 0.7  |
| KIT(V559D)                   | 14  | 0.3  |
| KIT(V559D,T670I)             | 56  | 2.6  |

|                   |      |      |
|-------------------|------|------|
| KIT(V559D,V654A)  | 51   | 3.5  |
| KIT-autoinhibited | 100  | 100  |
| LATS1             | 100  | 100  |
| LATS2             | 100  | 100  |
| LCK               | 90   | 60   |
| LIMK1             | 100  | 84   |
| LIMK2             | 88   | 86   |
| LKB1              | 100  | 88   |
| LOK               | 100  | 62   |
| LRRK2             | 100  | 96   |
| LRRK2(G2019S)     | 96   | 98   |
| LTK               | 88   | 70   |
| LYN               | 100  | 88   |
| LZK               | 90   | 100  |
| MAK               | 90   | 96   |
| MAP3K1            | 100  | 100  |
| MAP3K15           | 100  | 99   |
| MAP3K2            | 100  | 79   |
| MAP3K3            | 100  | 100  |
| MAP3K4            | 97   | 86   |
| MAP4K2            | 100  | 100  |
| MAP4K3            | 87   | 91   |
| MAP4K4            | 91   | 84   |
| MAP4K5            | 92   | 76   |
| MAPKAPK2          | 100  | 100  |
| MAPKAPK5          | 95   | 47   |
| MARK1             | 84   | 83   |
| MARK2             | 100  | 96   |
| MARK3             | 100  | 100  |
| MARK4             | 92   | 93   |
| MAST1             | 97   | 89   |
| MEK1              | 0.65 | 0.05 |
| MEK2              | 0.75 | 0.05 |
| MEK3              | 22   | 1.4  |
| MEK4              | 19   | 0.35 |
| MEK5              | 0.2  | 0.1  |
| MEK6              | 23   | 21   |
| MELK              | 88   | 92   |
| MERTK             | 56   | 82   |
| MET               | 100  | 100  |
| MET(M1250T)       | 84   | 92   |
| MET(Y1235D)       | 97   | 100  |
| MINK              | 86   | 89   |
| MKK7              | 97   | 61   |
| MKMK1             | 100  | 100  |
| MKMK2             | 80   | 11   |

|           |     |     |
|-----------|-----|-----|
| MLCK      | 100 | 100 |
| MLK1      | 95  | 100 |
| MLK2      | 100 | 77  |
| MLK3      | 91  | 84  |
| MRCKA     | 96  | 89  |
| MRCKB     | 100 | 100 |
| MST1      | 94  | 100 |
| MST1R     | 92  | 88  |
| MST2      | 47  | 52  |
| MST3      | 88  | 99  |
| MST4      | 64  | 62  |
| MTOR      | 84  | 94  |
| MUSK      | 100 | 91  |
| MYLK      | 85  | 84  |
| MYLK2     | 92  | 80  |
| MYLK4     | 78  | 84  |
| MYO3A     | 96  | 93  |
| MYO3B     | 100 | 100 |
| NDR1      | 69  | 75  |
| NDR2      | 100 | 99  |
| NEK1      | 100 | 100 |
| NEK10     | 100 | 96  |
| NEK11     | 90  | 91  |
| NEK2      | 100 | 94  |
| NEK3      | 83  | 85  |
| NEK4      | 100 | 100 |
| NEK5      | 89  | 92  |
| NEK6      | 85  | 81  |
| NEK7      | 91  | 81  |
| NEK9      | 94  | 90  |
| NIK       | 98  | 71  |
| NIM1      | 100 | 100 |
| NLK       | 100 | 70  |
| OSR1      | 64  | 87  |
| p38-alpha | 100 | 93  |
| p38-beta  | 81  | 78  |
| p38-delta | 96  | 95  |
| p38-gamma | 90  | 81  |
| PAK1      | 95  | 93  |
| PAK2      | 100 | 100 |
| PAK3      | 76  | 48  |
| PAK4      | 96  | 86  |
| PAK6      | 100 | 98  |
| PAK7      | 86  | 79  |
| PCTK1     | 100 | 100 |
| PCTK2     | 100 | 95  |

|                       |     |      |
|-----------------------|-----|------|
| PCTK3                 | 100 | 100  |
| PDGFRA                | 44  | 1.4  |
| PDGFRB                | 1.5 | 0.05 |
| PDPK1                 | 69  | 72   |
| PFCDPK1(P.falciparum) | 97  | 89   |
| PFPK5(P.falciparum)   | 100 | 100  |
| PFTAIRE2              | 100 | 90   |
| PFTK1                 | 99  | 100  |
| PHKG1                 | 99  | 97   |
| PHKG2                 | 100 | 82   |
| PIK3C2B               | 100 | 100  |
| PIK3C2G               | 99  | 93   |
| PIK3CA                | 100 | 100  |
| PIK3CA(C420R)         | 80  | 79   |
| PIK3CA(E542K)         | 100 | 99   |
| PIK3CA(E545A)         | 61  | 67   |
| PIK3CA(E545K)         | 68  | 69   |
| PIK3CA(H1047L)        | 100 | 98   |
| PIK3CA(H1047Y)        | 67  | 63   |
| PIK3CA(I800L)         | 75  | 63   |
| PIK3CA(M1043I)        | 100 | 100  |
| PIK3CA(Q546K)         | 93  | 96   |
| PIK3CB                | 71  | 77   |
| PIK3CD                | 99  | 100  |
| PIK3CG                | 100 | 100  |
| PIK4CB                | 100 | 100  |
| PIM1                  | 98  | 89   |
| PIM2                  | 90  | 97   |
| PIM3                  | 100 | 79   |
| PIP5K1A               | 83  | 58   |
| PIP5K1C               | 100 | 100  |
| PIP5K2B               | 87  | 26   |
| PIP5K2C               | 100 | 92   |
| PKAC-alpha            | 79  | 70   |
| PKAC-beta             | 96  | 100  |
| PKMYT1                | 100 | 97   |
| PKN1                  | 84  | 75   |
| PKN2                  | 98  | 93   |
| PKNB(M.tuberculosis)  | 100 | 99   |
| PLK1                  | 100 | 100  |
| PLK2                  | 74  | 69   |
| PLK3                  | 94  | 83   |
| PLK4                  | 59  | 55   |
| PRKCD                 | 78  | 100  |
| PRKCE                 | 100 | 74   |
| PRKCH                 | 99  | 82   |

|                               |     |     |
|-------------------------------|-----|-----|
| PRKCI                         | 97  | 100 |
| PRKCQ                         | 100 | 100 |
| PRKD1                         | 75  | 10  |
| PRKD2                         | 72  | 2.5 |
| PRKD3                         | 100 | 12  |
| PRKG1                         | 98  | 99  |
| PRKG2                         | 84  | 82  |
| PRKR                          | 100 | 94  |
| PRKX                          | 100 | 100 |
| PRP4                          | 77  | 95  |
| PYK2                          | 99  | 88  |
| QSK                           | 100 | 99  |
| RAF1                          | 100 | 100 |
| RET                           | 100 | 97  |
| RET(M918T)                    | 100 | 99  |
| RET(V804L)                    | 98  | 93  |
| RET(V804M)                    | 100 | 100 |
| RIOK1                         | 77  | 15  |
| RIOK2                         | 100 | 100 |
| RIOK3                         | 74  | 0   |
| RIPK1                         | 89  | 96  |
| RIPK2                         | 91  | 76  |
| RIPK4                         | 100 | 89  |
| RIPK5                         | 100 | 95  |
| ROCK1                         | 100 | 99  |
| ROCK2                         | 100 | 96  |
| ROS1                          | 98  | 83  |
| RPS6KA4(Kin.Dom.1-N-terminal) | 100 | 100 |
| RPS6KA4(Kin.Dom.2-C-terminal) | 96  | 85  |
| RPS6KA5(Kin.Dom.1-N-terminal) | 100 | 100 |
| RPS6KA5(Kin.Dom.2-C-terminal) | 100 | 87  |
| RSK1(Kin.Dom.1-N-terminal)    | 67  | 74  |
| RSK1(Kin.Dom.2-C-terminal)    | 89  | 27  |
| RSK2(Kin.Dom.1-N-terminal)    | 82  | 69  |
| RSK2(Kin.Dom.2-C-terminal)    | 100 | 100 |
| RSK3(Kin.Dom.1-N-terminal)    | 100 | 100 |
| RSK3(Kin.Dom.2-C-terminal)    | 70  | 18  |
| RSK4(Kin.Dom.1-N-terminal)    | 78  | 62  |
| RSK4(Kin.Dom.2-C-terminal)    | 34  | 3   |
| S6K1                          | 100 | 100 |
| SBK1                          | 62  | 70  |
| SGK                           | 100 | 100 |
| SgK110                        | 100 | 100 |
| SGK2                          | 100 | 100 |
| SGK3                          | 100 | 98  |
| SIK                           | 90  | 96  |

|                              |     |      |
|------------------------------|-----|------|
| SIK2                         | 84  | 66   |
| SLK                          | 83  | 34   |
| SNARK                        | 100 | 100  |
| SNRK                         | 100 | 92   |
| SRC                          | 96  | 74   |
| SRMS                         | 94  | 84   |
| SRPK1                        | 68  | 83   |
| SRPK2                        | 100 | 100  |
| SRPK3                        | 73  | 47   |
| STK16                        | 100 | 100  |
| STK33                        | 92  | 100  |
| STK35                        | 94  | 82   |
| STK36                        | 7.1 | 0.95 |
| STK39                        | 99  | 100  |
| SYK                          | 87  | 82   |
| <b>TAK1</b>                  | 58  | 3.6  |
| TAOK1                        | 100 | 100  |
| TAOK2                        | 100 | 97   |
| TAOK3                        | 86  | 76   |
| TBK1                         | 83  | 80   |
| TEC                          | 91  | 98   |
| TESK1                        | 84  | 86   |
| TGFBR1                       | 82  | 57   |
| <b>TGFBR2</b>                | 3.8 | 0.9  |
| TIE1                         | 100 | 100  |
| TIE2                         | 96  | 82   |
| TLK1                         | 94  | 93   |
| TLK2                         | 95  | 100  |
| TNIK                         | 76  | 74   |
| TNK1                         | 40  | 25   |
| TNK2                         | 97  | 67   |
| TNNI3K                       | 95  | 77   |
| TRKA                         | 75  | 82   |
| TRKB                         | 94  | 77   |
| TRKC                         | 96  | 91   |
| TRPM6                        | 98  | 88   |
| TSSK1B                       | 58  | 79   |
| TTK                          | 100 | 100  |
| TXK                          | 100 | 85   |
| TYK2(JH1domain-catalytic)    | 100 | 100  |
| TYK2(JH2domain-pseudokinase) | 100 | 100  |
| TYRO3                        | 96  | 69   |
| ULK1                         | 83  | 79   |
| ULK2                         | 99  | 96   |
| ULK3                         | 74  | 83   |
| <b>VEGFR2</b>                | 78  | 5.2  |

|       |     |     |
|-------|-----|-----|
| VRK2  | 100 | 100 |
| WEE1  | 83  | 78  |
| WEE2  | 100 | 81  |
| WNK1  | 97  | 97  |
| WNK3  | 92  | 75  |
| YANK1 | 100 | 100 |
| YANK2 | 95  | 100 |
| YANK3 | 100 | 82  |
| YES   | 97  | 100 |
| YSK1  | 100 | 100 |
| YSK4  | 100 | 100 |
| ZAK   | 5.6 | 2.2 |
| ZAP70 | 83  | 86  |



## References:

- [1] T. Zhang, F. Inesta-Vaquera, M. Niepel, J. Zhang, S.B. Ficarro, T. Machleidt, T. Xie, J.A. Marto, N. Kim, T. Sim, J.D. Laughlin, H. Park, P.V. LoGrasso, M. Patricelli, T.K. Nomanbhoy, P.K. Sorger, D.R. Alessi, N.S. Gray, Discovery of potent and selective covalent inhibitors of JNK, *Chem Biol*, 19 (2012) 140-154.
- [2] Z. Zhang, A.G. Marshall, A universal algorithm for fast and automated charge state deconvolution of electrospray mass-to-charge ratio spectra, *J Am Soc Mass Spectrom*, 9 (1998) 225-233.
- [3] S.B. Ficarro, Y. Zhang, Y. Lu, A.R. Moghimi, M. Askenazi, E. Hyatt, E.D. Smith, L. Boyer, T.M. Schlaeger, C.J. Luckey, J.A. Marto, Improved electrospray ionization efficiency compensates for diminished chromatographic resolution and enables proteomics analysis of tyrosine signaling in embryonic stem cells, *Anal Chem*, 81 (2009) 3440-3447.
- [4] M. Askenazi, J.R. Parikh, J.A. Marto, mzAPI: a new strategy for efficiently sharing mass spectrometry data, *Nat Methods*, 6 (2009) 240-241.
- [5] J.M. Elkins, V. Fedele, M. Szklarz, K.R.A. Azeez, E. Salah, J. Mikolajczyk, S. Romanov, N. Sepetov, X.-P. Huang, B.L. Roth, Comprehensive characterization of the published kinase inhibitor set, *Nature biotechnology*, (2015).
- [6] P. Kuzmic, DynaFit--a software package for enzymology, *Methods Enzymol*, 467 (2009) 247-280.
- [7] P. Kuzmic, Determination of kinact and Ki for covalent inhibition using the OmniaR assay.
